# Supplementary material
Source: ML conference proceedings conference paper supplement (https://openreview.net/forum?id=DDmH3H78iJ)
Supplement: supplementary_material [file attachment]

---

# Discrete-Smoothness in Online Algorithms with Predictions

---

Anonymous Author(s)

Affiliation

Address

email

## Abstract

1 In recent years, there has been an increasing focus on designing online algorithms  
2 with (machine-learned) predictions. The ideal learning-augmented algorithm is  
3 comparable to the optimum when given perfect predictions (*consistency*), to the best  
4 online approximation for arbitrary predictions (*robustness*), and should interpolate  
5 between these extremes as a smooth function of the prediction error. In this paper,  
6 we quantify these guarantees in terms of a general property that we call *discrete-*  
7 *smoothness* and achieve discrete-smooth algorithms for online covering, specifically  
8 the facility location and set cover problems. For set cover, our work improves the  
9 results of Bamas, Maggiori, and Svensson (2020) by augmenting consistency and  
10 robustness with smoothness guarantees. For facility location, our work improves  
11 on prior work by Almanza et al. (2021) by generalizing to nonuniform costs and  
12 also providing smoothness guarantees by augmenting consistency and robustness.

## 13 1 Introduction

14 The field of *learning-augmented online algorithms* has gained rapid prominence in recent years.  
15 The basic premise is to provide an online algorithm with additional (machine-learned) predictions  
16 about the future to help bypass worst-case lower bounds. Since machine-learned predictions can  
17 be noisy in general, a key desideratum of the model is that the *competitive ratio* of the online  
18 algorithm should degrade gracefully with prediction error. In particular, the cost of the algorithm  
19 should be bounded against that of the predicted solution (called *consistency*) or that of an online  
20 algorithm without predictions (called *robustness*) and should smoothly interpolate between the two  
21 with increase in prediction error (called *smoothness*). (The terms consistency and robustness were  
22 originally coined by Purohit, Svitkina, and Kumar [38].) While robustness and consistency are  
23 problem-independent notions, smoothness depends on prediction error which has been defined in  
24 a problem-specific manner. In this paper, we introduce a novel, problem-independent notion of  
25 smoothness called *discrete-smoothness* that applies to any combinatorial problem. As illustrative  
26 applications of this new framework, we design discrete-smooth (learning-augmented) algorithms for  
27 two classic problems, *facility location* and *set cover*, which improve and generalize previous results  
28 for these problems due to Almanza et al. (NeurIPS '21 [1]) and Bamas et al. (NeurIPS '20 [11]).

29 First, we introduce discrete-smoothness. Suppose we are given a problem instance of size  $n$ . Let  $\text{OPT}$   
30 be a solution for this instance. (The reader may think of  $\text{OPT}$  as an optimal solution, although our  
31 guarantees will hold for any feasible solution.) Let the predicted solution be  $S$ . Ideally,  $S = \text{OPT}$ ;  
32 therefore, in general,  $\text{OPT}$  comprises two parts: the predicted part  $\text{OPT}|_S := \text{OPT} \cap S$  and the  
33 unpredicted part  $\text{OPT}|_{\bar{S}} := \text{OPT} \setminus S$ . On the predicted part  $\text{OPT}|_S$ , the algorithm has a meaningful  
34 signal from the prediction but the noise in the signal is given by the overprediction  $s_\Delta := |S \setminus \text{OPT}|$ .  
35 Naturally, the competitive ratio of the algorithm on this part will degrade with increase in this noise.  
36 On the unpredicted part  $\text{OPT}|_{\bar{S}}$ , the algorithm does not have any signal from the prediction and cannot

37 hope for a better competitive ratio than that of an online algorithm without prediction. Putting the  
 38 two together, a learning-augmented algorithm ALG should satisfy

$$\text{ALG} \leq O(f(s_\Delta)) \cdot \text{OPT}|_S + O(f(n)) \cdot \text{OPT}|_{\bar{S}}, \quad (1)$$

39 where  $O(f(\cdot))$  is the competitive ratio without prediction. We call the property of Equation (1)  
 40 *discrete-smoothness*.

41 Let us first argue that Equation (1) recovers consistency and robustness. Consistency follows from  
 42 setting  $S = \text{OPT}$ ; then, Equation (1) demands a constant approximation to  $\text{OPT}$ . Similarly, robustness  
 43 follows from the fact that for any  $S$ , the right hand side of Equation (1) is at most  $O(f(n)) \cdot \text{OPT}$ .

44 Next, we show that the two terms  $f(s_\Delta)$  and  $f(n)$  in Equation (1) are the best possible. For the first  
 45 term, consider a prediction  $S$  comprising the entire instance (of size  $n$ ); in this case, we cannot hope  
 46 for the better than  $f(n)$ -competitive algorithm; thus,  $f(s_\Delta)$  is necessary in the first term. And, for the  
 47 second term, consider an empty prediction  $S = \emptyset$ , in which case we again cannot hope for a better  
 48 than  $f(n)$ -competitive algorithm; thus,  $f(n)$  is necessary in the second term. Note that the asymmetry  
 49 between these two terms is necessary: specifically,  $f(n)$  cannot be replaced by  $f(|\text{OPT} \setminus S|)$  since  
 50 that would imply an  $f(\text{OPT})$ -competitive online algorithm when  $S = \emptyset$ . This is impossible, e.g., for  
 51 the set cover problem.

52 A technical subtlety of the definition of discrete-smoothness (Equation (1)) is that given a fixed  
 53 prediction  $S$ , the minimum value of the right hand side might actually be a solution  $\text{OPT}$  that is  
 54 different from an optimal solution to the problem instance. So, although the solution  $\text{OPT}$  is intuitively  
 55 an optimal solution, we require that a discrete-smooth algorithm satisfy Equation (1) for *all* feasible  
 56 solutions  $\text{OPT}$ , and not just optimal solutions.

## 57 1.1 Our Results

58 We apply discrete-smoothness to the classic problems of online facility location and set cover. For  
 59 these problems, we obtain results that improve on prior work. We describe these next.

60 **Online Facility Location with Predictions.** In the online facility location problem, we are given  
 61 offline a metric space  $(X, \delta)$  where each point  $v \in X$  has an associated facility opening cost  $f_v \geq 0$ .  
 62 On receiving an online request for a client at some location  $x \in X$ , the online algorithm must connect  
 63 the client to an open facility at some location  $v \in X$  incurring connection cost  $\delta(x, v)$ . At any time,  
 64 the algorithm is also allowed to open a facility at any location  $v \in X$  by incurring the opening cost  $f_v$ .  
 65 (Note that a client cannot update her connection even if a closer facility is opened later.) The total  
 66 cost of the algorithm is the sum of opening costs of opened facilities and connection costs of clients.

67 The first result for the online facility location problem is due to Meyerson [33] who obtained a  
 68 randomized algorithm with a competitive ratio of  $O(\log n)$  for  $n$  requests. This result was first  
 69 derandomized [18], and later the competitive ratio slightly improved to  $O\left(\frac{\log n}{\log \log n}\right)$  [19], by Fotakis.  
 70 This latter bound is asymptotically tight. More recently, the online facility location problem has  
 71 been considered in the context of machine-learned *predictions* (OFLP) by several papers [20, 1, 22].  
 72 Of these, the work of Almanza et al. [1] is the closest to our work (the other papers use metric  
 73 error measures that are incomparable to our results). In [1], the offline input additionally contains a  
 74 predicted solution of facilities  $S \subseteq X$ , where we denote  $|S| = s$ . By restricting the available facilities  
 75 to the predicted set, they obtained an  $O(\log s)$ -competitive algorithm for uniform facility opening  
 76 costs, under the condition that  $\text{OPT} \subseteq S$ .

77 We improve and generalize the Almanza et al. work by giving a discrete-smooth algorithm for the  
 78 OFLP problem, i.e., an algorithm ALG that satisfies Equation (1):

79 **Theorem 1.1.** *There is an algorithm ALG for online (nonuniform) facility location with a predicted*  
 80 *solution  $S$  that satisfies for every solution  $\text{OPT}$*

$$\text{ALG} \leq O(\log s_\Delta) \cdot \text{OPT}|_S + O(\log n) \cdot \text{OPT}|_{\bar{S}}, \quad (2)$$

81 where  $s_\Delta$  is the number of facilities in  $S \setminus \text{OPT}$  and  $n$  is the number of online requests. Here,  $\text{OPT}|_S$   
 82 (resp.,  $\text{OPT}|_{\bar{S}}$ ) represents the sum of opening costs of facilities in  $\text{OPT} \cap S$  (resp.,  $\text{OPT} \setminus S$ ) and  
 83 connection costs of all clients connecting to facilities in  $\text{OPT} \cap S$  (resp.,  $\text{OPT} \setminus S$ ).

84 This generalizes and improves the Almanza et al. result in three ways:

- The result is generalized from uniform facility opening costs to arbitrary (nonuniform) costs. In fact, even for the online facility location problem (without prediction), we get an  $O(\log m)$ -competitive algorithm for arbitrary (nonuniform) facility opening costs — previously, Almanza et al. only established this for uniform costs.
- The assumption that  $\text{OPT} \subseteq S$ , i.e., the prediction contains the entire solution, is no longer required.
- If  $\text{OPT} \subseteq S$  (i.e., under the assumption of the Almanza et al. result), the competitive ratio improves from  $O(\log s)$  to  $O(\log s_\Delta)$ . That is, the dependence is only on the prediction error and not the entire prediction.

In some situations, the length of the request sequence  $n$  can exceed the size of the metric space  $m$ . To address this situation, we show that  $n$  can be replaced by  $m$  in the above result:

**Theorem 1.2.** *There is an algorithm ALG for online (nonuniform) facility location with a predicted solution  $S$  that satisfies for every solution OPT*

$$\text{ALG} \leq O(\log s_\Delta) \cdot \text{OPT}|_S + O(\log m) \cdot \text{OPT}|\bar{S}, \quad (3)$$

where  $m$  is the number of facilities in the metric space overall.

**Online Set Cover with Predictions.** In the online set cover problem, we are given offline a universe of elements  $E$  and  $m$  sets defined on them  $U \subseteq 2^E$  with nonnegative costs. In each online step, we get a new element  $e \in E$ . If  $e$  is not already covered by the current solution, then the algorithm must add a new set from  $U$  that contains  $e$  to its solution. The total cost of the algorithm is the sum of costs of all sets in its solution.

Alon et al. [3] gave the first algorithm for the online set cover problem by introducing the online primal dual method, and obtained a competitive ratio of  $O(\log m \log n)$  where  $n$  denotes the number of requests. They also proved an almost matching lower bound of  $\Omega\left(\frac{\log m \log n}{\log \log m + \log \log n}\right)$ . Bamas, Maggiori, and Svensson [11] extended their work to online set cover *with predictions* (OSCP), where the offline input additionally contains a predicted solution of sets  $S \subseteq U$ . They established consistency and robustness bounds for this problem by adapting the online primal dual method to use the predicted solution. The cost of their algorithm is bounded by the minimum of  $O(\log n)$  times the cost of the prediction and  $O(\log m \log n)$  times the optimal cost. However, this algorithm does not provide a smoothness guarantee.

We obtain a discrete-smooth algorithm for the OSCP problem, thereby giving the first algorithm for OSCP that goes beyond only consistency and robustness and achieves a smoothness guarantee:

**Theorem 1.3.** *There is an algorithm ALG for online set cover with a predicted solution  $S$  that satisfies for every solution OPT*

$$\text{ALG} \leq O(\log s_\Delta \log n) \cdot \text{OPT}|_S + O(\log m \log n) \cdot \text{OPT}|\bar{S}, \quad (4)$$

where  $s_\Delta$  is the number of sets in  $S \setminus \text{OPT}$ . Here,  $\text{OPT}|_S$  (resp.,  $\text{OPT}|\bar{S}$ ) represents the sum of costs of sets in  $\text{OPT} \cap S$  (resp.,  $\text{OPT} \setminus \bar{S}$ ).

## 1.2 Our Techniques: A Framework for Discrete-Smooth Algorithms

At a high level, our framework merges two online algorithms to obtain a discrete-smooth algorithm. The algorithms differ in the guarantees they provide. The first algorithm  $\text{ALG}_1$  gets a sharper competitive ratio of  $O(f(s))$  but against the optimal solution restricted to the prediction  $S$ . The second algorithm  $\text{ALG}_2$  has the standard competitive ratio of  $O(f(n))$  but against the unconstrained optimum OPT. The main challenge in the combiner algorithm (call it ALG) is to decide how to route online requests to the two algorithms. The natural choice would be to decide this based on whether  $\text{OPT}|_S$  or  $\text{OPT}|\bar{S}$  serves the request in OPT: in the first case, the request should be routed to  $\text{ALG}_1$  and in the second case, it should be routed to  $\text{ALG}_2$ . But, of course, we do not know OPT and therefore don't know  $\text{OPT}|_S$  and  $\text{OPT}|\bar{S}$ .

Before we describe the combiner strategy, consider the properties that these algorithms need to satisfy.

- First, consider the *subset* of requests served by  $\text{OPT}|_S$ . Intuitively,  $\text{ALG}_1$  should be competitive on these requests, which means that we need a stronger property from  $\text{ALG}_1$  that its

cost on any subset of requests is competitive against the optimal solution for this subset. We call this property *subset competitiveness*.<sup>1</sup> Symmetrically, subset competitiveness of  $\text{ALG}_2$  ensures that it is competitive on the requests in  $\text{OPT}|_{\bar{S}}$ .

- Next, we need a guarantee on the cost of  $\text{ALG}_1$  on  $\text{OPT}|_{\bar{S}}$ , and symmetrically, of  $\text{ALG}_2$  on  $\text{OPT}|_S$ . For this, we first augment  $\text{ALG}_1, \text{ALG}_2$  to address the *prize-collecting* version of the original problem, where each online request can be ignored at a *penalty cost*. (Note that this is more general than the original problem where every online request must be served, since the latter can be recovered by setting the penalties to be infinitely large.) Setting the penalties appropriately, we ensure that the total penalty of the requests in  $\text{OPT}|_S$  is bounded against the cost of  $\text{ALG}_1$  on those requests (similarly for  $\text{OPT}|_{\bar{S}}$ ).
- Finally, we require that the cost of  $\text{ALG}_1, \text{ALG}_2$  on any set of requests is bounded against the total penalty of the requests. We call this strengthened competitiveness w.r.t. penalties the *Lagrangian property*<sup>2</sup>. Note that this ensures that the cost of  $\text{ALG}_1, \text{ALG}_2$  on  $\text{OPT}|_{\bar{S}}, \text{OPT}|_S$  are respectively bounded.

Now, we give the formal definition of Lagrangian subset-competitiveness that we motivated above. We use  $\text{ALG}(Q'|Q)$  to refer to the total cost of  $\text{ALG}$  incurred when addressing a subset  $Q' \subseteq Q$  as part of running on an input  $Q$ . For any prize collecting solution  $\text{SOL}$  for input  $Q$ , we separate its total cost into  $\text{SOL}^b(Q)$  (buying cost) and  $\text{SOL}^p(Q)$  (penalty cost). We formalize the Lagrangian subset-competitiveness property below:

**Definition 1.4 (Lagrangian subset-competitive algorithm).** Let  $\text{ALG}$  be a randomized prize-collecting algorithm running on an input  $Q$ . For any competitive ratio  $\beta$ , we say that  $\text{ALG}$  is Lagrangian  $\beta$ -subset-competitive if for every subset  $Q' \subseteq Q$  we have

$$\mathbb{E}[\text{ALG}(Q'|Q)] \leq \beta \cdot \text{OPT}^b(Q') + O(1) \cdot \text{OPT}^p(Q') \quad (5)$$

If in the equation above we replace the unconstrained optimum ( $\text{OPT}$ ) by the optimal solution that can only use the prediction  $S$ , we say that  $\text{ALG}$  is Lagrangian  $\beta$ -subset-competitive w.r.t.  $S$ .

We now give the combiner algorithm:

**Algorithm 1:** Smooth merging framework (The combiner algorithm)

- 1 Let  $\text{ALG}_1, \text{ALG}_2$  be two prize-collecting Lagrangian subset-competitive algorithms.
- 2 **Event Function**  $\text{UPONREQUEST}(q)$
- 3   Let  $\alpha$  be the minimum penalty such that releasing  $(q, \alpha)$  to  $\text{ALG}_1, \text{ALG}_2$  would result in the request being served in either  $\text{ALG}_1$  or  $\text{ALG}_2$ . (The value of  $\alpha$  can be determined by a standard “guess-and-double”.)
- 4   Release  $(q, \alpha)$  to both  $\text{ALG}_1$  and  $\text{ALG}_2$ . Buy the items bought by  $\text{ALG}_1, \text{ALG}_2$  as a result of this step.

The algorithm is simple: for a new online request  $q$ , the framework chooses the minimum penalty  $\alpha$  which ensures that at least one of the two constituent algorithms  $\text{ALG}_1, \text{ALG}_2$  would actually serve  $q$  (instead of paying the penalty).  $(q, \alpha)$  is then presented as a (prize-collecting) request to both algorithms. (Recall that the combined algorithm is for the non-prize-collecting problem, but the individual algorithms  $\text{ALG}_1, \text{ALG}_2$  are for the prize-collecting problem.) At this stage, one of the algorithms serves the request (due to the choice of  $\alpha$ ) while the other may choose to pay the penalty. The combiner algorithm now simply buys all items bought by either algorithm.

Finally, we state the guarantees of the combiner algorithm informally. (For a formal description, see Appendix C.)

**Theorem 1.5.** (Informal) If  $\text{ALG}_1, \text{ALG}_2$  are Lagrangian  $\beta$ -subset-competitive algorithms for  $\beta = f(s), f(n)$  respectively, then Algorithm 1 satisfies the discrete-smoothness property (Equation (1)).

**Applications of Theorem 1.5:** Section 2 and Appendix B give Lagrangian subset-competitive algorithms for facility location, and Section 3 gives a Lagrangian subset-competitive algorithm for set

<sup>1</sup>Our subset-competitiveness property is similar to [9].

<sup>2</sup>Our Lagrangian competitiveness is similar to the Lagrangian multiplier preserving property in approximation algorithms for prize-collecting problems, e.g., [37, 26].

cover. Given these constituent algorithms, we use Theorem 1.5 to prove Theorem 1.1 and Theorem 1.2 for facility location and Theorem 1.3 for set cover. These proofs are given in Appendix C.6.

**Related Work.** There is a growing body of work in online algorithms with predictions in the last few years (see, e.g., the surveys [35, 36]). This model was introduced by Lykouris and Vassilvitskii for the caching problem [32] and has since been studied for a variety of problem classes: rent or buy [27, 25, 21, 41, 5, 39], covering [11], scheduling [27, 41, 10, 28, 34, 30, 8], caching [31, 40, 24, 13], matching [29, 16, 7, 23], graph problems [6, 22, 1, 14, 4, 20, 9], and so on. Prior works on online facility location with predictions either do not consider prediction error [1] or use continuous notions of error [22, 20], such as functions of the distances between predicted and optimal facilities. Our discrete notion of error refers only to whether an optimal item is predicted. Similarly, prior work on online set cover with predictions [11, 4] also does not consider prediction error. Finally, we note that discrete prediction error (similar to this paper) as well as hybrids between discrete and continuous error have also been considered [42, 9, 14] but the prediction here is on the input rather than the solution.

## 2 Online Facility Location

In this section, we consider metric, nonuniform facility location with predictions and present a novel prize-collecting algorithm TREEPROXY. This algorithm is Lagrangian  $O(\log|S|)$ -subset-competitive w.r.t. the prediction  $S$  of possible facilities; thus, it is used in our framework to prove Theorems C.9 and C.10, which in turn imply Theorems 1.1 and 1.2, respectively. In addition, TREEPROXY is a result independent of our framework/predictions: the competitiveness guarantee shown for TREEPROXY also achieves  $O(\log m)$  competitiveness where  $m = |X|$  is the size of the metric space.

We prove the following theorem:

**Theorem 2.1.** *For facility location with predictions, there exists a randomized prize-collecting algorithm ALG with a monotone online amortization OA which is Lagrangian  $O(\log|S|)$ -subset competitive using OA w.r.t.  $S$ .*

### 2.1 The Algorithm

**Weighted hierarchically-separated trees (HSTs).** The algorithm starts by embedding the metric space into the leaves of a weighted 3-HST, a metric space in which edge weights decrease at least exponentially as one descends from the root.

**Definition 2.2.** For  $\gamma > 1$ , a rooted tree with weights  $c$  to the edges is a *weighted  $\gamma$ -HST* if for every two edges  $e_1, e_2$  such that  $e_2$  is a parent edge of  $e_1$ , it holds that  $c(e_2) \geq \gamma c(e_1)$ .

The following result is often used for embedding general metric spaces into weighted HSTs; it involves composing the embeddings of Fakcharoenphol et al. [17] and Bansal et al. [12].

**Theorem 2.3** (Due to [17] and [12]). *For every metric space  $(X, \delta)$  and constant  $\gamma$ , there exists a distribution  $\mathcal{D}$  over weighted  $\gamma$ -HSTs of depth  $O(\log|X|)$  in which the points in  $X$  are the leaves of the HST, such that for every two points  $x_1, x_2 \in X$  we have:*

1.  $\delta(x_1, x_2) \leq \delta_T(x_1, x_2)$  for every  $T$  in the support of  $\mathcal{D}$ .
2.  $\mathbb{E}_{T \sim \mathcal{D}}[\delta_T(x_1, x_2)] \leq O(\log|X|) \cdot \delta(x_1, x_2)$ .

The algorithm starts by embedding the induced metric space of  $S$  into a weighted HST using Theorem 2.3;  $T$  denotes the resulting tree, and  $r$  denotes its root. For each edge  $e \in T$ , we denote by  $c(e)$  the cost of the edge  $e$ . Denote the set of leaves in the subtree rooted at  $v$  by  $L(v)$ ; note that  $L(r) = S$ . Denote the distance between two nodes  $u, v$  in the tree by  $\delta_T(u, v)$ . For every point  $u \in X$ , define  $p(u) := \arg \min_{u' \in S} \delta(u, u')$ ; that is,  $p(u)$  is the closest predicted point to  $u$  (abusing notation, we similarly define  $p(q)$  for request  $q$ ).

**Proxy list.** After embedding  $S$  into the leaves of a tree, the algorithm must open facilities on those leaves to serve requests. Intuitively, at any point the algorithm considers some (possibly internal) node  $v \in T$ , and considers connecting the current request through  $v$  to a facility in  $L(v)$ . Choosing from  $L(v)$  introduces a tradeoff between the cost of opening the facility and its distance from  $v$ .

218 For every  $v$ , we identify the leaves in  $L(v)$  which offer the best points in this tradeoff (i.e., a Pareto  
 219 frontier), and only allow the algorithm to choose from these leaves. This subset is called the *proxy*  
 220 *list* of  $v$ , and denoted  $P(v) \subseteq L(v)$ .

221 We now define the proxy list  $P(v)$ . For ease of notation, define the logarithmic class operator  
 222  $\ell(x) := \lfloor \log x \rfloor$ . For node  $v \in T$ , we construct the proxy list  $P(v) \subseteq L(v)$  using the following  
 223 process:

- 224 1. Start with  $V \leftarrow L(v)$ .
- 225 2. While there exist distinct  $v_1, v_2 \in V$  such that  $\ell(f_{v_1}) \geq \ell(f_{v_2})$  and  $\ell(\delta_T(v, v_1)) \geq$   
 226  $\ell(\delta_T(v, v_2))$ , remove  $v_1$  from  $V$ .
- 227 3. Output  $V$  as  $P(v)$ .

228 We denote by  $k(v)$  the size of the proxy list  $P(v)$ . We order the proxy list of  $v$  by increasing facility  
 229 cost, thus writing  $P(v) = (s_1^v, \dots, s_{k(v)}^v)$ . For every  $v, i$ , we use the shorthands  $f_i^v := f_{s_i^v}$  and  
 230  $\delta_i^v := \delta_T(v, s_i^v)$ . Slightly abusing notation, for every node  $v \in T$  we define  $c(v) := c(e_v)$  where  $e_v$  is  
 231 the edge connecting  $v$  to its parent node (for  $r$ , we define  $c(r) = \infty$ ). For a more streamlined notation,  
 232 for every node  $v \in T$  we define  $\delta_0^v := c(v)$  and  $f_{k(v)+1}^v := \infty$ .

233 **Observation 2.4.** For every node  $v \in T$ , the proxy list  $P(v)$  satisfies:

- 234 1. For every  $u \in L(v)$ , there exists index  $i$  such that  $\ell(f_i^v) \leq \ell(f_u)$  and  $\ell(\delta_i^v) \leq \ell(\delta_T(v, u))$ .
- 235 2. For every distinct  $1 \leq i < j \leq k(v) + 1$ , it holds that  $\ell(f_i^v) < \ell(f_j^v)$ .
- 236 3. For every distinct  $0 \leq i < j \leq k(v)$ , it holds that  $\ell(\delta_i^v) > \ell(\delta_j^v)$ .

237 When  $i = 0$ , the third item in Observation 2.4 uses the fact that  $T$  is a weighted 3-HST; thus, the cost  
 238 of an edge is at least twice the distance from the child node of that edge to any descendant leaf.

239 **Counters.** For every node  $v$  and every  $i \in \{1, \dots, k(v) + 1\}$ , we define a counter  $\lambda(v, i)$  of size  $f_i^v$ .

240 **Algorithm description.** The algorithm for facility location with predictions is given in Algorithm 2.  
 241 Initially, the algorithm embeds the metric space induced by  $S$  into a weighted 3-HST  $T$ , using  
 242 Theorem 2.3; upon each node in this  $T$  the proxy lists are computed, and the corresponding counters  
 243 are assigned. Upon the release of a request  $(q, \pi)$ , the function UPONREQUEST is triggered. Upon  
 244 receiving  $(q, \pi)$ , it maps the request to the closest point  $p(q)$  in  $S$  (that is, a leaf of the HST). Then,  
 245 the algorithm attempts to solve the request on the HST through a process of increasing counters,  
 246 which we soon describe. (While the described algorithm raises these counters continuously, the  
 247 process can easily be discretized, replacing the continuous growth with jumping discretely to the next  
 248 event.) The algorithm keeps track of (some measure of) the cost involved; if during UPONREQUEST  
 249 that amount exceeds the penalty  $\pi$ , the algorithm pays the penalty instead (see Line 9).

250 When solving the request on  $u = p(q)$ , the algorithm climbs up the branch of  $u$ , until a facility is  
 251 found (or opened) to connect  $u$ . At each ancestor  $v$  of  $u$ , the algorithm invests a growing amount  $\tau_v$   
 252 in advancing the proxy list of  $v$  (i.e., buying a facility in  $P(v)$  closer to  $v$ ). It raises the counter for  
 253 the next item on the proxy list until full, at which point the relevant proxy facility is opened, and the  
 254 next counter in the proxy list begins to increase. (Note that the same facility can be “opened” more  
 255 than once due to being on multiple proxy lists.) Once  $\tau_v$  reaches the cost of connecting  $v$  to an open  
 256 proxy, the algorithm stops increasing counters and makes the connection. When no proxy in  $P(v)$  is  
 257 open, it could be that  $\tau_v$  exceeds the cost of moving from  $v$  to its parent  $p(v)$ ; in this case, we ascend  
 258 the branch and explore proxies for  $p(v)$ . Note that the function UPONREQUEST of Algorithm 2  
 259 also returns a value; this return value is the online amortization cost of the request, to be used in the  
 260 analysis of the algorithm. (See Figure 1 for an example.)

261 The analysis of Algorithm 2, and the proof of Theorem 2.1, appear in Appendix A.

### 262 3 Online Set Cover

263 In this section, we present and analyze an algorithm for prize-collecting fractional set cover which  
 264 uses the well-known multiplicative updates method, and show that it is Lagrangian subset-competitive.  
 265 Using this algorithm together with Algorithm 1 yields Theorem 1.3 (the proof appears in Appendix C).

**Algorithm 2: TREEPROXY for Prize-Collecting Facility Location with Predictions**

```

1 Initialization
2   Embed the prediction  $S$  into a weighted
   3-HST  $T$  using Theorem 2.3.
3   For every  $v \in T$ , and every
    $i \in \{1, \dots, k(v) + 1\}$ , set  $\lambda(v, i) \leftarrow 0$ .
4   For every  $v \in T$ , set  $t(v) \leftarrow 0$ .
5 Event Function UPONREQUEST( $q, \pi$ )
   // Upon the next request  $q$  with penalty  $\pi$  in
   the sequence
6   Define  $u, v \leftarrow p(q)$ .
7   Define  $\tau \leftarrow 0, \tau^v \leftarrow 0$ .
8   continually increase  $\tau, \tau^v$  and
    $\lambda(v, t(v) + 1)$  at the same rate until:
9   if  $\tau + \delta(u, q) \geq \pi$  then // cost for request
   exceeds penalty; pay penalty instead.
10    Pay the penalty  $\pi$  for the request.
11    return  $\tau + \pi$ . // return amortized cost.
12  if  $\lambda(v, t(v) + 1) = f_{t(v)+1}^v$  then // counter
   for next proxy is full; open facility at
   proxy.
13    Open a facility at  $s_{t(v)+1}^v$ .
14    Increment  $t(v)$ .
15    goto Line 8.
16  if  $\tau^v \geq \delta_{t(v)}^v$  then
17    if  $t(v) = 0$  then
18      // escalate the request to parent node.
19      Set  $v \leftarrow p(v)$ .
20      Define  $\tau^v \leftarrow 0$ .
21      goto Line 8.
22    Connect  $q$  to  $s_{t(v)}^v$ . // connect request to
   closest proxy.
   return  $\tau + (\tau + \delta(u, q))$ . // return
   amortized cost.

```

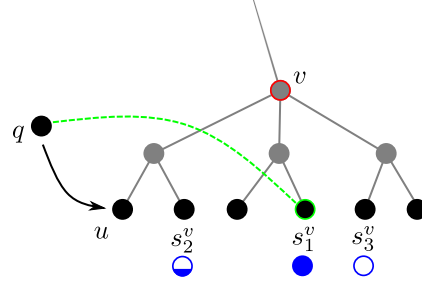

Figure 1: A possible state of Algorithm 2, immediately before connecting a request  $q$ . Here,  $q$  has been mapped to  $u$ , which is the closest point in  $S$ . The variable  $v$ , an ancestor of  $u$ , is shown, as is its proxy list  $s_1^v, s_2^v, s_3^v$ . The counters of the proxy list are also shown:  $\lambda(v, 1)$  is full (and a facility thus exists in  $s_1^v$ ), and  $\lambda(v, 2)$  is partial (the last counter to be raised handling  $q$ ). At some point, the growth in the counters of  $v$  exceeded the distance from  $v$  to  $s_1^v$ , and thus the connection of  $q$  to  $s_1^v$  is made.

**Algorithm 3: Online Prize-Collecting Fractional Set Cover**

```

1 Initialization
2   Set  $x_s \leftarrow 0$  for every set  $s$ .
3 Event Function UPONREQUEST ( $q, \pi$ )
4   Set  $y_q \leftarrow 0$ .
5   while  $\sum_{s \in U(q)} x_s \leq 1$  do
6     Set  $y_q \leftarrow y_q + 1$ 
7     if  $\pi \leq y_q$  then
8       Pay penalty  $\pi$  for  $q$ .
9       return  $\text{OA}(q, \pi) = 3\pi$ .
10    foreach  $s \in U(q)$  do
11       $x_s \leftarrow x_s \cdot (1 + \frac{1}{c_s}) + \frac{1}{|U(q)|c_s}$ 
12  return  $\text{OA}(q, \pi) = 2y_q$ .

```

266 *Preliminaries.* In prize-collecting fractional set cover, we are given a universe with elements  $E$   
 267 and sets  $U$ ; we define  $m := |U|$ . A solution may fractionally buy sets, according to a cost function  
 268  $c$ . Requests then arrive online, where each request is for covering some element  $e \in E$ , which is  
 269 contained in some subfamily of sets from  $U$ . To cover an element, an algorithm must hold fractions of  
 270 sets containing  $e$  which sum to at least 1. Observe that fractional set cover with predictions conforms  
 271 to the definition of an online covering problem with predictions; in this problem, the items are the  
 272 sets. For prize-collecting fractional set cover, we prove the following theorem.

273 **Theorem 3.1.** *There exists a deterministic algorithm ALG for prize-collecting fractional set cover*  
 274 *that ALG is Lagrangian  $O(\log m)$ -subset-competitive*

275 Theorem 3.1 implies that, in the framework of Algorithm 1, our algorithm can be used as the general  
 276 component, independent of the prediction. But, given a prediction  $S \subseteq U$ , we can simply restrict the  
 277 family of sets used by the algorithm to the given prediction, yields an algorithm competitive against  
 278  $\text{OPT}_S$ . Thus, Theorem 3.1 immediately yields the following corollary.

279 **Corollary 3.2.** *There exists a deterministic algorithm ALG for prize-collecting fractional set cover*  
 280 *such that ALG is Lagrangian  $O(\log m')$ -subset-competitive w.r.t. prediction  $S \subseteq U$ , where  $|S| = m'$ .*

281 **The Algorithm.** The algorithm for prize-collecting set cover is given in Algorithm 3. The algorithm  
 282 follows the standard multiplicative updates method: while the pending request is uncovered, sets  
 283 containing that request are bought at an exponential rate (see [2, 15]). However, in this prize-  
 284 collecting version, the algorithm never lets its cost for a specific request exceed its penalty. For ease  
 285 of notation, define  $U(q)$  to be the collection of sets containing  $q$ ; that is,  $U(q) := \{s \in U \mid q \in s\}$ .

286 **Analysis.** We prove the two following lemmas:

287 **Lemma 3.3.** *For every  $(q, \pi) \in Q$ , it holds that  $\text{ALG}(q, \pi) \leq 3\pi$ .*

288 **Lemma 3.4.** *For every subset  $Q' \subseteq Q$ , we have  $\text{ALG}(Q'|Q) \leq O(\log m) \cdot \text{OPT}(\overline{Q'})$ , where  $\overline{Q'}$  is  
 289 the non-prize-collecting input formed from  $Q'$ .*

290 These two lemmas imply *penalty-robust subset competitiveness*, a property shown in Proposition C.7  
 291 to be equivalent to Lagrangian subset-competitiveness. Thus, we focus on proving these lemmas;  
 292 note that the proof of Lemma 3.4 appears in Appendix E.

293 **Proposition 3.5.** *In every iteration of  $\text{UPONREQUEST}(q, \pi)$ , it holds that the total buying cost is at  
 294 most  $2y_q$ , where  $y_q$  be the final value of the variable of the same name.*

295 *Proof.* Consider each time  $y_q$  is incremented. The total cost of buying sets is the following.

$$\sum_{s \in U(q)} c_s \cdot \left( x_s \cdot \frac{1}{c_s} + \frac{1}{|U(q)|c_s} \right) = 1 + \sum_{s \in U(q)} x_s \leq 2$$

296 where the inequality is due to the fact that  $\sum_{s \in U(q)} x_s \leq 1$ . Thus, each time  $y_q$  is incremented by 1,  
 297 the cost of buying sets is at most 2, completing the proof.  $\square$

298 *Proof of Lemma 3.3.* Consider  $\text{UPONREQUEST}(q, \pi)$ . If it returned through Line 11, it holds that  
 299  $y_q \leq \pi$ ; Proposition 3.5 shows that the total buying cost was thus at most  $2\pi$ , and this cost is also  
 300  $\text{ALG}(q, \pi)$ . Otherwise, the function returned through Line 8; in this case, since  $y_q$  was incremented  
 301 immediately before comparing  $y_q$  to  $\pi$ , the argument from the proof of Proposition 3.5 implies that  
 302 the total buying cost is at most  $2(y_q - 1)$  (using the final value of  $y_q$ ). In turn, this is at most  $2\pi$ . In  
 303 addition, the algorithm paid the penalty of  $\pi$ ; overall,  $\text{ALG}(q, \pi) \leq 3\pi$ .  $\square$

304 *Proof of Theorem 3.1.* Lemma 3.3 and Lemma 3.4 show that the algorithm is  $O(\log m)$ -PRSC;  
 305 Proposition C.7 then yields that the algorithm is Lagrangian  $O(\log m)$ -subset-competitive.  $\square$

## 306 4 Experiments

307 *Input Generation.* Our set cover instances contain 100 elements. (The number of sets will vary in  
 308 the experiments.) Every set contains every element with some constant probability  $\alpha$  (we choose  
 309  $\alpha = 0.02$ ); that is, the input is represented by a random bipartite graph in which each edge manifests  
 310 independently. Since this may not cover every element, we also add singleton sets for all elements.  
 311 We generate random costs for the sets, independently drawn from a log-normal distribution ( $\mu =$   
 312  $0, \sigma = 1.6$ ).

313 For a given input, we generate a prediction in the following way:

- 314 1. Using an LP solver, we obtain an optimal fractional solution to the problem instance.
- 315 2. We randomly round the solution, such that every set appears in the prediction with probability  
 316 proportional to its value in the fractional solution.
- 317 3. We apply noise to the prediction, of two types: false-positive noise, in which every set is  
 318 added to the prediction with some probability  $p$ ; and false-negative noise, in which every  
 319 set is removed from the prediction with some probability  $q$ . (The reader should think of  $p$   
 320 and  $q$  as the classification error where the predictions were generated using a classifier.)
- 321 4. Finally, we add the singleton sets to the prediction, to ensure that the prediction covers all  
 322 elements.

323 *Baselines and evaluation.* We evaluate our algorithm described in Section 3, denoted  
 324  $\text{SMOOTHMERGE}$ , against three baselines: the standard online algorithm without predictions, denoted



| $p, q$      | ON<br>comp. ratio | PREDON<br>comp. ratio | BASEMERGE<br>comp. ratio | SMOOTHMERGE<br>comp. ratio |
|-------------|-------------------|-----------------------|--------------------------|----------------------------|
| 0, 0        | 6.007 (0.244)     | <u>1.689</u> (0.070)  | 3.102 (0.565)            | 2.779 (0.122)              |
| 0, 0.15     | 6.007 (0.244)     | 46.815 (54.436)       | 6.246 (1.516)            | <u>3.820</u> (0.555)       |
| 0, 0.3      | 6.007 (0.244)     | 96.156 (76.196)       | 7.093 (1.358)            | <u>4.824</u> (0.687)       |
| 0.005, 0    | 6.007 (0.244)     | 1.989 (0.106)         | 3.648 (0.630)            | 3.251 (0.184)              |
| 0.005, 0.15 | 6.007 (0.244)     | 25.983 (30.294)       | 6.597 (1.642)            | 4.200 (0.534)              |
| 0.005, 0.3  | 6.007 (0.244)     | 51.533 (43.375)       | 7.543 (1.541)            | 5.120 (0.642)              |
| 0.02, 0     | 6.007 (0.244)     | <u>2.631</u> (0.154)  | 4.489 (0.660)            | 4.240 (0.266)              |
| 0.02, 0.15  | 6.007 (0.244)     | 10.555 (7.549)        | 7.007 (1.496)            | <u>5.024</u> (0.498)       |
| 0.02, 0.3   | 6.007 (0.244)     | 17.588 (9.549)        | 8.156 (1.433)            | <u>5.760</u> (0.569)       |

Table 1: Competitive ratios for varying  $p, q$ , in a "mean (standard deviation)" format. Best values in each row are underlined.

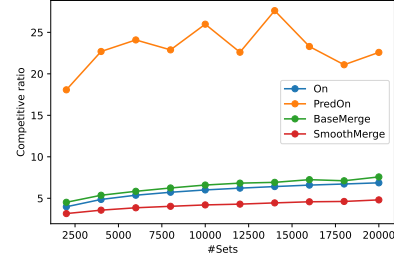

Figure 2: The competitive ratio for varying numbers of sets.

ON; the online algorithm restricted to predicted sets, denoted PREDON; and the standard merging BASEMERGE of those two algorithms, which alternates between ON and PREDON whenever the overall cost doubles. For every choice of parameters, we measure the costs of the four algorithms; these costs are then averaged over 300 different random inputs. We then measure the expected competitive ratio of each algorithm. Our experiments were run on an AWS EC2 r5.16xlarge machine.

We ran the following experiments: (a) we vary the false-positive rate  $p$  and the false-negative rate  $q$  keeping the number of sets fixed at 10000 (Table 1), and (b) we vary the number of sets in the input, fixing  $p = 0.005, q = 0.15$  (Figure 2).

*Experimental Results.* We ran two sets of experiments. In the first experiment, we varied the false-positive rate  $p$  and the false-negative rate  $q$  keeping the number of sets fixed at 10000. The results are reported in Table 1. We note that our algorithm SMOOTHMERGE outperforms the standard merging algorithm BASEMERGE and the online algorithm without predictions ON consistently across all values of  $p, q$ . SMOOTHMERGE also outperforms PREDON, the online algorithm restricted to the prediction, except when there are no false negatives, i.e.,  $q = 0$ . This is to be expected because  $q = 0$  implies that there is a good solution contained in the prediction. When  $q > 0$ , PREDON fails miserably and our algorithm SMOOTHMERGE obtains a competitive ratio that is an order of magnitude better than PREDON. This demonstrates the lack of robustness of PREDON because it is specifically tuned to correct predictions.

In the second set of experiments, we varied the number of sets in the input fixing the noise rates  $p = 0.005, q = 0.15$ . The results are reported in Figure 2. Our algorithm SMOOTHMERGE consistently outperforms all the baseline algorithms. In particular, it is able to utilize predictions to outperform ON, which the standard merging BASEMERGE is unable to achieve. Moreover, as the number of sets in the input grows, the gap between the two merging solutions increases.

## 5 Discussion

In this paper, we presented a novel framework for smooth interpolation between robustness and consistency guarantees in learning-augmented online algorithms. We applied this framework to obtain new results for two classical problems, set cover and facility location, that improve and generalize previous results for these problems. More broadly, predictions for online algorithms are of two forms: prediction of the input and that of the solution. The notion of discrete-smoothness applies to any online combinatorial problem in the latter category, i.e., where a solution is provided in the form of a prediction to the algorithm. In recent years, many problems have been considered in this model including rent or buy problems, scheduling, matching, graph problems, etc. For all of these problems, the discrete-smoothness framework alleviates the need for problem-specific notions of prediction error and instead gives a common framework for arguing about the gradual degradation of solution quality with increase in prediction error. We hope that the current work will streamline the desiderata for learning-augmented online algorithms by adding this problem-independent notion of smoothness to the established (and also problem-independent) properties of consistency and robustness.

## References

- [1] Matteo Almanza, Flavio Chierichetti, Silvio Lattanzi, Alessandro Panconesi, and Giuseppe Re. Online facility location with multiple advice. In Marc’Aurelio Ranzato, Alina Beygelzimer, Yann N. Dauphin, Percy Liang, and Jennifer Wortman Vaughan, editors, *Advances in Neural Information Processing Systems 34: Annual Conference on Neural Information Processing Systems 2021, NeurIPS 2021, December 6-14, 2021, virtual*, pages 4661–4673, 2021.
- [2] Noga Alon, Baruch Awerbuch, Yossi Azar, Niv Buchbinder, and Joseph Naor. The online set cover problem. In Lawrence L. Larmore and Michel X. Goemans, editors, *Proceedings of the 35th Annual ACM Symposium on Theory of Computing, June 9-11, 2003, San Diego, CA, USA*, pages 100–105. ACM, 2003.
- [3] Noga Alon, Baruch Awerbuch, Yossi Azar, Niv Buchbinder, and Joseph Naor. The online set cover problem. *SIAM J. Comput.*, 39(2):361–370, 2009.
- [4] Keerti Anand, Rong Ge, Amit Kumar, and Debmalya Panigrahi. Online algorithms with multiple predictions. In Kamalika Chaudhuri, Stefanie Jegelka, Le Song, Csaba Szepesvári, Gang Niu, and Sivan Sabato, editors, *International Conference on Machine Learning, ICML 2022, 17-23 July 2022, Baltimore, Maryland, USA*, volume 162 of *Proceedings of Machine Learning Research*, pages 582–598. PMLR, 2022.
- [5] Keerti Anand, Rong Ge, and Debmalya Panigrahi. Customizing ML predictions for online algorithms. In *Proceedings of the 37th International Conference on Machine Learning, ICML 2020, 13-18 July 2020, Virtual Event*, volume 119 of *Proceedings of Machine Learning Research*, pages 303–313. PMLR, 2020.
- [6] Antonios Antoniadis, Christian Coester, Marek Elias, Adam Polak, and Bertrand Simon. Online metric algorithms with untrusted predictions. In *Proceedings of the 37th International Conference on Machine Learning, ICML 2020*, 2020.
- [7] Antonios Antoniadis, Themis Gouleakis, Pieter Kleer, and Pavel Kolev. Secretary and online matching problems with machine learned advice. In Hugo Larochelle, Marc’Aurelio Ranzato, Raia Hadsell, Maria-Florina Balcan, and Hsuan-Tien Lin, editors, *Advances in Neural Information Processing Systems 33: Annual Conference on Neural Information Processing Systems 2020, NeurIPS 2020, December 6-12, 2020, virtual*, 2020.
- [8] Yossi Azar, Stefano Leonardi, and Noam Touitou. Flow time scheduling with uncertain processing time. In Samir Khuller and Virginia Vassilevska Williams, editors, *STOC ’21: 53rd Annual ACM SIGACT Symposium on Theory of Computing, Virtual Event, Italy, June 21-25, 2021*, pages 1070–1080. ACM, 2021.
- [9] Yossi Azar, Debmalya Panigrahi, and Noam Touitou. Online graph algorithms with predictions. In Joseph (Seffi) Naor and Niv Buchbinder, editors, *Proceedings of the 2022 ACM-SIAM Symposium on Discrete Algorithms, SODA 2022, Virtual Conference / Alexandria, VA, USA, January 9 - 12, 2022*, pages 35–66. SIAM, 2022.
- [10] Étienne Bamas, Andreas Maggiori, Lars Rohwedder, and Ola Svensson. Learning augmented energy minimization via speed scaling. In Hugo Larochelle, Marc’Aurelio Ranzato, Raia Hadsell, Maria-Florina Balcan, and Hsuan-Tien Lin, editors, *Advances in Neural Information Processing Systems 33: Annual Conference on Neural Information Processing Systems 2020, NeurIPS 2020, December 6-12, 2020, virtual*, 2020.
- [11] Étienne Bamas, Andreas Maggiori, and Ola Svensson. The primal-dual method for learning augmented algorithms. In Hugo Larochelle, Marc’Aurelio Ranzato, Raia Hadsell, Maria-Florina Balcan, and Hsuan-Tien Lin, editors, *Advances in Neural Information Processing Systems 33: Annual Conference on Neural Information Processing Systems 2020, NeurIPS 2020, December 6-12, 2020, virtual*, 2020.
- [12] Nikhil Bansal, Niv Buchbinder, Aleksander Madry, and Joseph Naor. A polylogarithmic-competitive algorithm for the k-server problem. In Rafail Ostrovsky, editor, *IEEE 52nd Annual Symposium on Foundations of Computer Science, FOCS 2011, Palm Springs, CA, USA, October 22-25, 2011*, pages 267–276. IEEE Computer Society, 2011.

- 413 [13] Nikhil Bansal, Christian Coester, Ravi Kumar, Manish Purohit, and Erik Vee. Scale-free  
414 allocation, amortized convexity, and myopic weighted paging. *CoRR*, abs/2011.09076, 2020.
- 415 [14] Giulia Bernardini, Alexander Lindermayr, Alberto Marchetti-Spaccamela, Nicole Megow, Leen  
416 Stougie, and Michelle Sweering. A universal error measure for input predictions applied to  
417 online graph problems. In *NeurIPS*, 2022.
- 418 [15] Niv Buchbinder and Joseph Naor. The design of competitive online algorithms via a primal-dual  
419 approach. *Found. Trends Theor. Comput. Sci.*, 3(2-3):93–263, 2009.
- 420 [16] Paul Dütting, Silvio Lattanzi, Renato Paes Leme, and Sergei Vassilvitskii. Secretaries with  
421 advice. In Péter Biró, Shuchi Chawla, and Federico Echenique, editors, *EC '21: The 22nd  
422 ACM Conference on Economics and Computation, Budapest, Hungary, July 18-23, 2021*, pages  
423 409–429. ACM, 2021.
- 424 [17] Jittat Fakcharoenphol, Satish Rao, and Kunal Talwar. A tight bound on approximating arbitrary  
425 metrics by tree metrics. *Journal of Computer and System Sciences*, 69(3):485–497, 2004.  
426 Special Issue on STOC 2003.
- 427 [18] Dimitris Fotakis. A primal-dual algorithm for online non-uniform facility location. *J. Discrete  
428 Algorithms*, 5(1):141–148, 2007.
- 429 [19] Dimitris Fotakis. On the competitive ratio for online facility location. *Algorithmica*, 50(1):1–57,  
430 2008.
- 431 [20] Dimitris Fotakis, Evangelia Gergatsouli, Themis Gouleakis, and Nikolas Patrís. Learning  
432 augmented online facility location. *CoRR*, abs/2107.08277, 2021.
- 433 [21] Sreenivas Gollapudi and Debmalya Panigrahi. Online algorithms for rent-or-buy with expert  
434 advice. In Kamalika Chaudhuri and Ruslan Salakhutdinov, editors, *Proceedings of the 36th  
435 International Conference on Machine Learning, ICML 2019, 9-15 June 2019, Long Beach,  
436 California, USA*, volume 97 of *Proceedings of Machine Learning Research*, pages 2319–2327.  
437 PMLR, 2019.
- 438 [22] Shaofeng H.-C. Jiang, Erzhi Liu, You Lyu, Zhihao Gavin Tang, and Yubo Zhang. Online facility  
439 location with predictions. In *The Tenth International Conference on Learning Representations,  
440 ICLR 2022, Virtual Event, April 25-29, 2022*. OpenReview.net, 2022.
- 441 [23] Zhihao Jiang, Pinyan Lu, Zhihao Gavin Tang, and Yuhao Zhang. Online selection problems  
442 against constrained adversary. In Marina Meila and Tong Zhang, editors, *Proceedings of the  
443 38th International Conference on Machine Learning, ICML 2021, 18-24 July 2021, Virtual  
444 Event*, volume 139 of *Proceedings of Machine Learning Research*, pages 5002–5012. PMLR,  
445 2021.
- 446 [24] Zhihao Jiang, Debmalya Panigrahi, and Kevin Sun. Online algorithms for weighted caching  
447 with predictions. In *47th International Colloquium on Automata, Languages, and Programming,  
448 ICALP 2020*, 2020.
- 449 [25] Ali Khanafer, Murali Kodialam, and Krishna P. N. Puttaswamy. The constrained ski-rental  
450 problem and its application to online cloud cost optimization. In *Proceedings of the INFOCOM*,  
451 pages 1492–1500, 2013.
- 452 [26] Jochen Könnemann, Sina Sadeghian Sadeghabad, and Laura Sanità. An LMP  $o(\log n)$ -  
453 approximation algorithm for node weighted prize collecting steiner tree. In *54th Annual  
454 IEEE Symposium on Foundations of Computer Science, FOCS 2013, 26-29 October, 2013,  
455 Berkeley, CA, USA*, pages 568–577. IEEE Computer Society, 2013.
- 456 [27] Ravi Kumar, Manish Purohit, and Zoya Svitkina. Improving online algorithms via ML pre-  
457 dictions. In Samy Bengio, Hanna M. Wallach, Hugo Larochelle, Kristen Grauman, Nicolò  
458 Cesa-Bianchi, and Roman Garnett, editors, *Advances in Neural Information Processing Sys-  
459 tems 31: Annual Conference on Neural Information Processing Systems 2018, NeurIPS 2018,  
460 December 3-8, 2018, Montréal, Canada*, pages 9684–9693, 2018.

- [28] Silvio Lattanzi, Thomas Lavastida, Benjamin Moseley, and Sergei Vassilvitskii. Online scheduling via learned weights. In Shuchi Chawla, editor, *Proceedings of the 2020 ACM-SIAM Symposium on Discrete Algorithms, SODA 2020, Salt Lake City, UT, USA, January 5-8, 2020*, pages 1859–1877. SIAM, 2020.
- [29] Thomas Lavastida, Benjamin Moseley, R. Ravi, and Chenyang Xu. Learnable and instance-robust predictions for online matching, flows and load balancing. In Petra Mutzel, Rasmus Pagh, and Grzegorz Herman, editors, *29th Annual European Symposium on Algorithms, ESA 2021, September 6-8, 2021, Lisbon, Portugal (Virtual Conference)*, volume 204 of *LIPIcs*, pages 59:1–59:17. Schloss Dagstuhl - Leibniz-Zentrum für Informatik, 2021.
- [30] Russell Lee, Jessica Maghakian, Mohammad H. Hajiesmaili, Jian Li, Ramesh K. Sitaraman, and Zhenhua Liu. Online peak-aware energy scheduling with untrusted advice. In Herman de Meer and Michela Meo, editors, *e-Energy '21: The Twelfth ACM International Conference on Future Energy Systems, Virtual Event, Torino, Italy, 28 June - 2 July, 2021*, pages 107–123. ACM, 2021.
- [31] Thodoris Lykouris and Sergei Vassilvitskii. Competitive caching with machine learned advice. In Jennifer G. Dy and Andreas Krause, editors, *Proceedings of the 35th International Conference on Machine Learning, ICML 2018, Stockholmsmässan, Stockholm, Sweden, July 10-15, 2018*, volume 80 of *Proceedings of Machine Learning Research*, pages 3302–3311. PMLR, 2018.
- [32] Thodoris Lykouris and Sergei Vassilvitskii. Competitive caching with machine learned advice. *J. ACM*, 68(4):24:1–24:25, 2021.
- [33] Adam Meyerson. Online facility location. In *42nd Annual Symposium on Foundations of Computer Science, FOCS 2001, 14-17 October 2001, Las Vegas, Nevada, USA*, pages 426–431, 2001.
- [34] Michael Mitzenmacher. Scheduling with predictions and the price of misprediction. In Thomas Vidick, editor, *11th Innovations in Theoretical Computer Science Conference, ITCS 2020, January 12-14, 2020, Seattle, Washington, USA*, volume 151 of *LIPIcs*, pages 14:1–14:18. Schloss Dagstuhl - Leibniz-Zentrum für Informatik, 2020.
- [35] Michael Mitzenmacher and Sergei Vassilvitskii. Algorithms with predictions. In Tim Roughgarden, editor, *Beyond the Worst-Case Analysis of Algorithms*, pages 646–662. Cambridge University Press, 2020.
- [36] Michael Mitzenmacher and Sergei Vassilvitskii. Algorithms with predictions. *Commun. ACM*, 65(7):33–35, 2022.
- [37] Anna Moss and Yuval Rabani. Approximation algorithms for constrained node weighted steiner tree problems. *SIAM J. Comput.*, 37(2):460–481, 2007.
- [38] Manish Purohit, Zoya Svitkina, and Ravi Kumar. Improving online algorithms via ML predictions. In Samy Bengio, Hanna M. Wallach, Hugo Larochelle, Kristen Grauman, Nicolò Cesa-Bianchi, and Roman Garnett, editors, *Advances in Neural Information Processing Systems 31: Annual Conference on Neural Information Processing Systems 2018, NeurIPS 2018, December 3-8, 2018, Montréal, Canada*, pages 9684–9693, 2018.
- [39] Shufan Wang, Jian Li, and Shiqiang Wang. Online algorithms for multi-shop ski rental with machine learned advice. In Hugo Larochelle, Marc’Aurelio Ranzato, Raia Hadsell, Maria-Florina Balcan, and Hsuan-Tien Lin, editors, *Advances in Neural Information Processing Systems 33: Annual Conference on Neural Information Processing Systems 2020, NeurIPS 2020, December 6-12, 2020, virtual*, 2020.
- [40] Alexander Wei. Better and simpler learning-augmented online caching. In Jaroslav Byrka and Raghu Meka, editors, *Approximation, Randomization, and Combinatorial Optimization. Algorithms and Techniques, APPROX/RANDOM 2020, August 17-19, 2020, Virtual Conference*, volume 176 of *LIPIcs*, pages 60:1–60:17. Schloss Dagstuhl - Leibniz-Zentrum für Informatik, 2020.

- 510 [41] Alexander Wei and Fred Zhang. Optimal robustness-consistency trade-offs for learning-  
511 augmented online algorithms. In Hugo Larochelle, Marc'Aurelio Ranzato, Raia Hadsell,  
512 Maria-Florina Balcan, and Hsuan-Tien Lin, editors, *Advances in Neural Information Processing*  
513 *Systems 33: Annual Conference on Neural Information Processing Systems 2020, NeurIPS*  
514 *2020, December 6-12, 2020, virtual*, 2020.
- 515 [42] Chenyang Xu and Benjamin Moseley. Learning-augmented algorithms for online steiner tree. In  
516 *Thirty-Sixth AAAI Conference on Artificial Intelligence, AAAI 2022, Thirty-Fourth Conference*  
517 *on Innovative Applications of Artificial Intelligence, IAAI 2022, The Twelveth Symposium on*  
518 *Educational Advances in Artificial Intelligence, EAAI 2022 Virtual Event, February 22 - March*  
519 *1, 2022*, pages 8744–8752. AAAI Press, 2022.

## 520 A Analysis of Algorithm 2

521 For this analysis section, we fix any input  $Q = ((q_1, \pi_1), \dots, (q_n, \pi_n))$ . For both ALG and  $\text{OPT}_S$   
 522 we use the superscript f to refer only to facility opening costs and c to refer only to connection costs.  
 523 We denote by  $\text{OA}(q, \pi)$  the value returned by UPONREQUEST in Algorithm 2 upon receiving the pair  
 524  $(q, \pi)$ ; we choose  $(\text{OA}(q, \pi))$  as the online amortization of Algorithm 2.

525 **Online Amortization.** First, we show that the cost of the algorithm is bounded by the online  
 526 amortization:

527 **Lemma A.1.** *It holds that  $\text{ALG}(Q) \leq \text{OA}(Q)$ .*

528 *Proof.* We use the subscript  $q$  to refer to the final value of a variable in  $\text{UPONREQUEST}(q, \pi)$ . The  
 529 cost of the algorithm has the following three components:

- 530 1. Penalties paid.
- 531 2. Opening costs for facilities in  $S$ .
- 532 3. Connection costs for facilities in  $S$ .

533 Let  $Q' \subseteq Q$  be the set of requests served by the algorithm (i.e., no penalty was paid).

534 **Penalties for requests in  $Q \setminus Q'$ .** Consider that whenever a penalty  $\pi$  is paid for a request in Line 10,  
 535 the additive term  $\pi$  appears in the amortized cost of that request. We charge the penalty cost to that  
 536 term.

537 **Opening cost.** Note that a facility  $s_i^v$  is only opened (at cost  $f_i^v$ ) when the counter  $\lambda(v, i)$  reaches  
 538  $f_i^v$ , and that counter is never used again; thus, the total opening cost can be charged to the sum over  
 539 request  $q$  of the amount by which request  $q$  raises counters, which is  $\tau_q$ . We charge this to the term  
 540  $\tau_q$  in  $\text{OA}(q, \pi)$ .

541 **Connection cost for requests in  $Q'$ .** Suppose a request  $(q, \pi) \in Q'$  is connected to some point  
 542  $w \in S$ . There exists an index  $i$  such that  $w = s_i^{v_q}$ . It holds that

$$\delta(q, w) \leq \delta(q, u_q) + \delta(u_q, w) \leq \delta(q, S) + \delta_T(u_q, w) \leq \delta(q, S) + \delta_T(u_q, v_q) + \delta_T(v_q, w). \quad (6)$$

543 where the first and third inequalities are due to the triangle inequality, and the second inequality is due  
 544 to the definition of  $u_q$  and Theorem 2.3. Now, note that  $\delta_T(v_q, w) = \delta_i^{v_q} \leq \tau_q^{v_q}$  from the condition of  
 545 Line 16.

546 Enumerate the path in the tree between  $u_q$  and  $v_q$  as  $u_q = w_0, w_1, \dots, w_k = v_q$ , and note that  
 547  $\delta_T(u_q, v_q) = \sum_{j=0}^{k-1} c(w_j)$ . Now, note that the variable  $v$  advanced from  $w_j$  to  $w_{j+1}$  due to  $\tau_q^{w_j} \geq$   
 548  $c(w_j)$ ; thus,  $\delta_T(u_q, v_q) = \sum_{j=0}^{k-1} \tau_q^{w_j}$ . Finally, note that  $\sum_{j=0}^k \tau_q^{w_j} = \tau_q$ ; combining, we get

$$\delta_T(u_q, v_q) + \delta_T(v_q, w) \leq \sum_{j=0}^k \tau_q^{w_j} = \tau_q$$

549 Plugging the above into Equation (6), we get  $\delta(q, w) \leq \tau_q + \delta(q, S)$ . We thus charge the connection  
 550 cost of requests from  $Q'$  to the  $(\tau_q + \delta(q, S))$  term in  $\text{OA}(q, \pi)$ .

551 This completes the proof of the lemma. □

552 **Observation A.2.** *The online amortization OA of Algorithm 2 is monotone.*

553 **Bounding Amortized Costs.** Having shown that the online amortization is valid and monotone, it  
 554 remains to bound the amortized cost of the algorithm. To show that the algorithm is Lagrangian  
 555 subset-competitive, it is enough to show that it is PRSC; see Proposition C.7. We thus focus on  
 556 showing that the algorithm is PRSC using OA w.r.t.  $S$ .

557 From this point on, for every node  $v \in T$  and index  $i \in [k(v) + 1]$ , we slightly abuse notation and use  
 558  $\lambda(v, i)$  to refer to both the counter itself, and its value at the end of the algorithm.

559 **Proposition A.3** (Penalty Robustness). *For every  $(q, \pi) \in Q$ , it holds that  $\text{OA}(q, \pi) \leq 2\pi$ .*

560 *Proof.* If  $\text{UPONREQUEST}(q, \pi)$  returns in Line 22, then it must be that the condition in Line 9 has  
 561 failed, and thus  $\tau + \delta(u, q) \leq \pi$ ; thus,  $\text{OA}(q, \pi) = \tau + (\tau + \delta(u, q)) \leq 2\pi$ .

562 Otherwise,  $\text{UPONREQUEST}(q, \pi)$  returned on Line 11, in which case note that since  $\tau$  is raised  
 563 continuously from 0, Line 11 ensures that  $\tau \leq \pi$  at all times. Thus,  $\text{OA}(q, \pi) = \tau + \pi \leq 2\pi$ ,  
 564 completing the proof.  $\square$

565 It remains to show subset competitiveness for the algorithm. Henceforth, fix any subset of the input  
 566  $Q' \subseteq Q$ .

567 **Proposition A.4.** *For every request  $q$  and  $v \in T$ ,  $\tau_q^v \leq c(v)$ .*

568 *Proof.* Observe that  $\tau_q^v$  cannot exceed  $\delta_{t(v)}^v$ , for some current value of  $t(v)$ , or else the request is  
 569 connected (or escalated to a parent node). The fact that  $\delta_0^v = c(v)$ , together with the fact that  $\delta_i^v$  is a  
 570 decreasing sequence in  $i$  (Observation 2.4) complete the proof.  $\square$

571 We now begin to bound the (amortized) costs of the algorithm. Recall that  $\overline{Q'}$  is the input  $Q'$  with the  
 572 penalties set to infinity; that is, the prize-collecting input converted to the standard setting. We would  
 573 like to prove the following lemma.

574 **Lemma A.5.**  $\mathbb{E}[\text{OA}(Q'|Q)] \leq O(\log(|S|)) \cdot \text{OPT}_S(\overline{Q'})$ .

575 When the input consists of requests that are also from  $S$ , both the clients and facilities are from  $S$ , and  
 576 thus on the leaves of the tree  $T$ . In this case, we define  $\text{OPT}_T$  to be any solution for the input under  
 577 the metric space induced by the weighted HST  $T$ . To prove Lemma A.5, we first bound the cost of  
 578 the algorithm against  $\text{OPT}_T$  on a set of clients mapped to their closest neighbors in  $S$ .

579 **Lemma A.6.** *Let  $Q'_S$  be the input formed from  $Q'$  by mapping each request  $(q, \pi) \in Q'$  to the request  
 580  $(p(q), \pi)$ . It holds that*

$$\text{OA}(Q'|Q) \leq \sum_{(q, \pi) \in Q'} \delta(q, S) + O(D) \cdot \text{OPT}_T^f(\overline{Q'_S}) + O(1) \cdot \text{OPT}_T^c(\overline{Q'_S})$$

581 *Proof.* First, observe both **return** statements in Algorithm 2 and note that for every request  $(q, \pi) \in Q$   
 582 it holds that

$$\text{OA}(q, \pi) \leq 2\tau_q + \delta(q, S). \quad (7)$$

583 We now focus on bounding  $\sum_{(q, \pi) \in Q'} \tau_q$ , i.e., total amount by which counters are raised when  
 584 handling  $Q'$ . Let  $w$  be a facility opened in  $\text{OPT}_T(\overline{Q'_S})$ . Let  $R \subseteq Q'$  be the set of requests such that  
 585 their corresponding requests in  $\overline{Q'_S}$  are connected by  $\text{OPT}_T$  to the facility  $w$ . Using Observation 2.4,  
 586 for every ancestor tree node  $v$  of  $w$ , we define  $i_v$  to be the minimal index such that  $\ell(f_{i_v}^v) \leq \ell(f_w)$   
 587 and  $\ell(\delta_{i_v}^v) \leq \ell(\delta_T(v, w))$ .

588 Let  $P(w) = (v_0 = w, v_1, \dots, v_k = r)$  be the path from  $w$  to the root. The sum  $\sum_{(q, \pi) \in Q'} \tau_q$  can be  
 589 divided as follows:

590 1. Raising counters  $\lambda(v, i)$  for  $v \in P(w)$ ,  $i \leq i_v$ . The total amount here is at most

$$\begin{aligned} \sum_{v \in P(w)} \sum_{i=1}^{i_v} \lambda(v, i) &\leq \sum_{v \in P(w)} \sum_{i=1}^{i_v} f_i^v \leq \sum_{i=1}^{i_v} 2^{\ell(f_i^v)+1} \leq \sum_{v \in P(w)} 2^{\ell(f_{i_v}^v)+2} \\ &\leq \sum_{v \in P(w)} 2^{\ell(f_w)+2} \leq \sum_{v \in P(w)} 4f_w \leq 4Df_w. \end{aligned}$$

591 2. Raising counters  $\lambda(v, i)$  for  $v \notin P(w)$ . Consider a request  $q \in R$ , and define  $u := p(q) = u$   
 592 and  $v$  to be the lowest common ancestor of  $u$  and  $w$ . The only nodes not in  $P(w)$  in which  
 593 counters are raised when handling  $q$  are on the path from  $u$  (inclusive) to  $v$  (non-inclusive).  
 594 Using Proposition A.4, the total increase in counters for these nodes is at most  $\delta_T(u, v)$ .

3. Raising counters  $\lambda(v, i)$  for  $v \in P(w)$  and  $i > i_v$ . Suppose that a request  $q$  raises such a counter  $\lambda(v_j, i)$  for some node  $v_j \in P(w)$ . When such a counter is raised, the proxy  $s_{i_{v_j}}^{v_j}$  is already open, and thus the total raising of counters of index greater than  $i_{v_j}$  for  $v_j$  by  $q$  is at most  $\delta_{i_{v_j}}^{v_j} \leq 2\delta_w^{v_j} = 2\delta_T(v_j, v) + 2\delta_T(v, w)$ , where  $v$  is the lowest common ancestor of  $u$  and  $w$ . (Note that other proxies of  $v_j$  of larger index could be open, but they can only be closer to  $v_j$ , thus limiting the raising of counters even further.)

Of those two costs, we would like to charge  $q$  only for  $2\delta_T(v, w)$ , and charge  $2\delta_T(v_j, v)$  in aggregate over all  $q$ . To do so, observe that the counters for nodes in  $P(w) \setminus \{v_j\}$  that were raised upon request  $q$  must be of the form  $\lambda(v_l, 1)$  for  $v_l \in \{v_0, \dots, v_{j-1}\}$ . As the request  $q$  was repeatedly escalated from  $v$  to  $v_j$ , the total increase in those counters must be at least  $\delta_T(v, v_j)$ , and thus  $2\delta_T(v, v_j)$  is upper bounded by twice the increase in those counters. However, as seen in Item 1, over all requests, these increases sum to at most  $4Df_w$  over all  $q \in R$ ; thus, the term  $2\delta_T(v_j, v)$  sums in aggregate to at most  $8Df_w$ .

Overall, denoting by  $w^q$  the lowest common ancestor of  $p(q)$  and  $w$ , we get:

$$\begin{aligned} \sum_{(q, \pi) \in R} \tau(q, \pi) &\leq 4Df_w + \sum_{(q, \pi) \in R} \delta_T(p(q), w^q) + \left( 8Df_w + \sum_{(q, \pi) \in R} \delta_T(w^q, w) \right) \\ &\leq 12Df_w + 2\delta_T(p(q), w). \end{aligned}$$

Summing over all  $w$ , we get

$$\sum_{(q, \pi) \in Q'} \tau(q, \pi) \leq 12D \cdot \text{OPT}_T^f(\overline{Q'_S}) + 2 \cdot \text{OPT}_T^c(\overline{Q'_S}).$$

Combining with Equation (7), we get

$$\text{OA}(Q'|Q) \leq \sum_{(q, \pi) \in Q'} \delta(q, S) + 24D \cdot \text{OPT}_T^f(\overline{Q'_S}) + 4 \cdot \text{OPT}_T^c(\overline{Q'_S}). \quad \square$$

Having bounded the costs of the algorithm against  $\text{OPT}_T$ , we can now prove Lemma A.5.

*Proof of Lemma A.5.* Using Lemma A.6, we get the following.

$$\mathbb{E}[\text{OA}(Q'|Q)] \leq \sum_{(q, \pi) \in Q'} \delta(q, S) + \mathbb{E}\left[O(\log(|S|)) \cdot \text{OPT}_T^f(\overline{Q'_S}) + O(1) \cdot \text{OPT}_T^c(\overline{Q'_S})\right]$$

Now, note that every solution  $\text{OPT}_S(\overline{Q'_S})$  induces a solution for  $\overline{Q'_S}$  on  $T$ , which opens the same facilities and makes the same connections (through the tree); the new tree solution has the same facility opening costs, and connection costs which are, in expectation, at most  $O(\log(|S|))$ -times greater (see Theorem 2.3). Thus, we have

$$\mathbb{E}[\text{OA}(Q'|Q)] \leq \sum_{(q, \pi) \in Q'} \delta(q, S) + O(\log(|S|)) \cdot \text{OPT}_S(\overline{Q'_S})$$

Now, note that any solution  $\text{OPT}_S(\overline{Q'})$  induces a solution for  $\overline{Q'_S}$  of cost  $\sum_{(q, \pi) \in Q'} \delta(q, S) + \text{OPT}_S(\overline{Q'})$ , and also note that  $\sum_{(q, \pi) \in Q'} \delta(q, S)$  is a lower bound for  $\text{OPT}_S(\overline{Q'})$ . Plugging into the displayed equation above completes the proof of the lemma.  $\square$

*Proof of Theorem 2.1.* Lemma A.1 and Observation A.2 show that the online amortization OA is valid and monotone. Proposition A.3 shows penalty robustness, while Lemma A.5 shows subset competitiveness; thus, the algorithm is  $O(\log|S|)$ -PRSC using OA w.r.t.  $S$ . Using Proposition C.7, the algorithm is Lagrangian  $O(\log|S|)$ -subset-competitive using OA w.r.t.  $S$ .  $\square$



**Algorithm 4:** Variant of Fotakis' Algorithm for Prize-Collecting OFLP

```

1 Initialization
2   Let  $Q \leftarrow \emptyset$ .
3   Let  $F \leftarrow \emptyset$ .
4   For every  $v \in X$ , let  $p(v) \leftarrow 0$ .
5 Event Function UPONREQUEST( $q, \pi$ ) // Upon the next request  $q$  in the sequence on point  $u \in X$ 
6   Set  $Q \leftarrow Q \cup \{q\}$ .
7   Denote by  $v_0$  the closest open facility to  $q$ .
8   Define  $\tau_q \leftarrow \min\{\pi, \delta(q, F), \min_{v \in X}\{f_v - p(v) + \delta(q, v)\}\}$ 
9   if  $\tau_q = \delta(q, F)$  then
10    Connect  $q$  to the closest facility in  $F$ .
11  else if  $\tau_q = f_v - p(v) + \delta(q, v)$  for some  $v \in X$  then
12    Open a facility at  $v$ .
13    Connect  $q$  to  $v$ .
14  else
15    Pay the penalty  $\pi$  for  $q$ .
16  COMPUTEPOTENTIALS()
17  return  $2\tau_q$  // return amortized cost
18 Function COMPUTEPOTENTIALS()
19   For every  $q \in Q$ , define  $\lambda_q = \min\{\delta(q, F), \tau_q\}$ 
20   For every location  $v \in X$ , set  $p(v) \leftarrow \sum_{q \in Q} (\lambda_q - \delta(q, v))^+$ .

```

## B Online Facility Location: The $O(\log n)$ -Competitive Algorithm

In this section, we present and analyze a prize-collecting algorithm for facility location with predictions whose competitive ratio on the number of requests  $n = |Q|$ . As is required for using Algorithm 1, this algorithm is Lagrangian subset-competitive. This algorithm is based on the work of Fotakis [18] for the non-prize-collecting setting. Specifically, we prove the following theorem.

**Theorem B.1.** *For facility location with predictions, there exists a deterministic prize-collecting algorithm ALG with a monotone online amortization OA which is Lagrangian  $O(\log n)$ -subset-competitive using OA.*

### B.1 The Algorithm

**Algorithm's description.** This algorithm follows the main principles of Fotakis [18]. Each point in the metric space has an associated potential, such that when that potential exceeds the cost of opening a facility at that point, the facility is opened. This potential roughly translates to the amount by which the cost of the offline solution for known requests would decrease by opening a facility at that location. Observing each request, consider the ball centered at that request such that the closest open facility lies on the sphere of that ball; the request imposes a potential increase for every point inside that ball. However, as the requests now have penalties, these penalties cap the radius of the ball, i.e., limit the potential imposed by the requests.

Specifically, the algorithm assigns each request a cost  $\tau_q$ , which intuitively is the minimum cost of handling the current request. This cost could be the penalty cost, the cost of connecting to an open facility, or the cost of opening a facility (beyond the current potential budget) and then connecting to it. The algorithm spends an amortized cost of  $\tau_q$  to serve  $q$ , but a potential ball of radius  $\tau_q$  is also created to serve future requests (at an future cost of at most  $\tau_q$ ).

For every  $x$ , we use  $x^+$  as a shorthand for  $\max\{0, x\}$ . The prize-collecting algorithm based on [18] is given in Algorithm 4.

#### B.1.1 Analysis

We now analyze Algorithm 4 and show that it proves Theorem B.1. For this analysis, we fix the prize-collecting input  $Q$ . Next, we define the online amortization OA such that  $\text{OA}(q, \pi)$  is the value returned by UPONREQUEST in Theorem B.1 upon release of  $(q, \pi) \in Q$ .

## 652 Online Amortization

653 We first prove that OA is valid and monotone.

654 **Lemma B.2.** *The online amortization OA for Algorithm 4 is valid, i.e.,  $\text{ALG}(Q) \leq \text{OA}(Q)$ .*

655 *Proof.* For each request, observe the variable  $\tau_q$ , and note that:

- 656 • If the penalty  $\pi$  is paid for  $q$ , then  $\tau_q = \pi$ .
- 657 • If  $q$  is connected to some facility, the connection cost of  $q$  does not exceed  $\tau_q$ .

658 It remains to bound the opening costs of the algorithm. Observe the evolution of the potential function  
659  $\sum_{q \in Q} \min\{\delta(q, F), \tau_q\}$  as  $Q$  and  $F$  grow over time. This function is nonnegative, and grows by  
660 exactly  $\tau_q$  upon the release of  $(q, \pi)$  (after Line 8). Moreover, whenever a facility at  $v$  is opened (thus  
661 joining  $F$ ), it decreases this amount by exactly  $f_v$ . Thus, the total opening cost can be bounded by  
662  $\sum_{q \in Q} \tau_q$ .

663 Overall, we bounded the cost of the algorithm by  $\sum_{(q, \pi) \in Q} 2\tau_q = \sum_{(q, \pi) \in Q} \text{OA}(q, \pi)$ .  $\square$

664 **Observation B.3.** *The online amortization OA given for Algorithm 4 is a monotone online amortiza-*  
665 *tion.*

## 666 B.2 Bounding Amortized Costs

667 Having shown the necessary properties for the online amortization, we proceed to show that Algo-  
668 rithm 4 is Lagrangian subset-competitive using this amortization. As in Section 2, we first show that  
669 the algorithm is PRSC (see Proposition C.7); we begin by observing the penalty robustness of the  
670 algorithm.

671 **Observation B.4.** *For every  $(q, \pi) \in Q$ , it holds that  $\text{OA}(q, \pi) \leq 2\pi$ .*

672 We now fix the subset  $Q' \subseteq Q$  for the sake of proving subset competitiveness. Recall that  $\overline{Q'}$  is the  
673 standard input formed from the prize-collecting input  $Q'$  (by setting penalties to infinity).

674 Before proving subset-competitiveness, we need to prove the following simple lemma.

675 **Lemma B.5** (Min trace lemma). *Let  $(a_1, \dots, a_k), (b_1, \dots, b_k)$  be two sequences of non-negative*  
676 *numbers, and define  $c_{i,j} = \min(a_i, b_j)$ . Then if there exists  $z$  such that for every  $i$  it holds that*  
677  *$\sum_{j=1}^i c_{i,j} \leq z$ , then it holds that  $\sum_{i=1}^k c_{i,i} = O(\log k) \cdot z$ .*

678 *Proof.* We prove that  $\sum_{i=1}^k c_{i,i} \leq H_k \cdot z$  by induction on  $k$ , where  $H_k = \sum_{i=1}^k \frac{1}{i}$  is the  $k$ -th harmonic  
679 number. Note that the base case, in which  $k = 1$ , holds as  $c_{1,1} \leq z$ .

680 Now, for the general case, note that if we can find  $i$  such that  $c_{i,i} \leq \frac{z}{k}$ , then we can complete the proof  
681 by induction on the sequences  $(a_1, \dots, a_{i-1}, a_{i+1}, \dots, a_k)$  and  $(b_1, \dots, b_{i-1}, b_{i+1}, \dots, b_k)$ . (Note  
682 that the constraints required for this inductive instance are implied by the original constraints.) This  
683 induction would imply that  $\sum_{i' \neq i} c_{i',i'} \leq H_{k-1} \cdot z$ , to which adding  $c_{i,i}$  would complete the proof.

684 It remains to find  $i$  such  $c_{i,i} \leq \frac{z}{k}$ . We consider the constraint  $\sum_{j=1}^k c_{k,j} \leq z$ , and observe the following  
685 cases.

686 **Case 1:**  $c_{k,j}$  are equal for all  $j$ . In this case, all  $c_{k,j}$  are at most  $\frac{z}{k}$ . In particular, this is true for  $c_{k,k}$ ;  
687 thus, choosing  $i = k$  completes the proof.

688 **Case 2:**  $c_{k,j}$  are not all equal. In this case, observe  $j$  that minimizes  $c_{k,j}$ , and note that  $c_{k,j} \leq \frac{z}{k}$ .  
689 There exists  $j'$  such that  $c_{k,j} < c_{k,j'}$ , which implies  $c_{k,j} < a_k$ , and thus  $c_{k,j} = b_j$ , yielding  $b_j \leq \frac{z}{k}$ .  
690 But this implies  $c_{j,j} \leq b_j \leq \frac{z}{k}$ , and thus choosing  $i = j$  completes the proof.  $\square$

691 We can now prove subset-competitiveness, as stated in Lemma B.6.

692 **Lemma B.6.**  $\text{OA}(Q'|Q) \leq O(\log|Q'|) \cdot \text{OPT}(\overline{Q'})$ .

693 *Proof.* Let  $w$  be some facility opened by  $\text{OPT}(\overline{Q'})$ , and denote by  $R \subseteq \overline{Q'}$  the set of requests  
694 connected to that facility in  $\text{OPT}(\overline{Q'})$ . Define  $C_w := \sum_{(q,\pi) \in R} \delta(w, q)$  the total connection cost  
695 incurred by  $\text{OPT}(\overline{Q'})$  on the facility  $w$ . Enumerate these requests as  $((q_1, \pi_1), \dots, (q_k, \pi_k))$ , where  
696  $k = |R|$ . For  $1 \leq i \leq k$ , denote by  $F_i$  the set of facilities which were open immediately before the  
697 release of  $(q_i, \pi_i)$ . As a shorthand, we also define  $\tau_i = \tau_{q_i}$ . Consider that the total potential of the  
698 facility  $w$  can never exceed its cost  $f_w$ ; moreover, upon release of  $(q_i, \pi_i)$ , the choice of  $\tau_i$  ensures  
699 that

$$\begin{aligned}
f_w &\geq \tau_i - \delta(q_i, w) + \sum_{j=1}^{i-1} \min(\tau_j, (\delta(q_j, F_i) - \delta(q_j, w))^+) \\
&\geq \tau_i - \delta(q_i, w) + \sum_{j=1}^{i-1} \min(\tau_j, \delta(q_i, F_i) - \delta(q_i, w) - \delta(q_j, w) - \delta(q_j, w)) \\
&\geq \tau_i - \delta(q_i, w) + \sum_{j=1}^{i-1} \min(\tau_j, \tau_i - \delta(q_i, w)) - 2 \sum_{j=1}^{i-1} \delta(q_j, w) \\
&\geq \tau_i - \delta(q_i, w) + \sum_{j=1}^{i-1} \min(\tau_j, \tau_i - \delta(q_i, w)) - 2C_w \\
&\geq \sum_{j=1}^i \min(\tau_j, \tau_i - \delta(q_i, w)) - 2C_w
\end{aligned} \tag{8}$$

700 where the second inequality uses the triangle inequality and the third inequality uses the definition of  
701  $\tau_i$ .

702 From Equation (8), we have that for every  $1 \leq i \leq k$  it holds that

$$\sum_{j=1}^i \min(\tau_j, \tau_i - \delta(q_i, w)) \leq f_w + 2C_w.$$

703 Using Lemma B.5, this yields

$$\sum_{i=1}^k \min(\tau_i, \tau_i - \delta(q_i, w)) \leq O(\log k) \cdot (f_w + 2C_w)$$

704 Since  $\tau_i - \delta(q_i, w) = \min(\tau_i, \tau_i - \delta(q_i, w))$ , and since  $\sum_{i=1}^k \delta(q_i, w) = C_w$ , we have

$$\sum_{i=1}^k \tau_i \leq O(\log k) \cdot (f_w + C_w) \leq O(\log |Q'|) \cdot (f_w + C_w)$$

705 Finally, summing over all facilities  $w$  in  $\text{OPT}(\overline{Q'})$  yields

$$\sum_{(q,\pi) \in Q'} \tau_q \leq O(\log |Q'|) \text{OPT}(\overline{Q'}). \quad \square$$

706 *Proof of Theorem B.1.* Through Lemma B.2 and Observation B.3, we have that OA is a valid and  
707 monotone amortization for Algorithm 4. Lemma B.6 and Observation B.4 then yield that the  
708 algorithm is  $O(\log Q)$ -PRSC using OA. Using Proposition C.7 yields that the algorithm is Lagrangian  
709  $O(\log Q)$ -subset-competitive using OA, which completes the proof of the theorem.  $\square$

## 710 C The Smooth Combination Framework

711 In this section, we analyze the framework in Algorithm 1, and show that given correct constituent  
712 algorithms  $\text{ALG}_1, \text{ALG}_2$ , it yields the main theorems of this paper (Theorems 1.1 to 1.3).

## 713 C.1 Problem Class and Definitions

714 Before analyzing the framework, we first formalize the properties demanded of the online problem  
 715 for our framework to yield meaningful results. Specifically, we define *online covering problems with*  
 716 *predictions*, a class of problems which includes both set cover and facility location.

717 In online covering problems with predictions, we have a set of *items*  $\mathcal{E}$  given offline with associated  
 718 cost  $c(e)$  for  $e \in \mathcal{E}$ . A solution comprises any subset of these items, either fully (for integral  
 719 problems) or fractionally (for fractional problems). Requests arrive online and the algorithm must  
 720 augment its solution if needed to satisfy the request. Satisfaction is *upward-closed* – if a request is  
 721 satisfied by a set of items, it is also satisfied by any superset. In the prediction setting, the algorithm  
 722 is also given offline a predicted solution  $S \subseteq \mathcal{E}$ . In particular, this definition captures both set cover  
 723 and facility location: in set cover, the items are the sets; in facility location, there exist “opening”  
 724 items for facilities, and “connection” items for each facility/request pair.

725 For an input  $Q$ , we denote by  $\text{OPT}_S(Q)$  a solution to  $Q$  constrained to only buying items from  $S$ ,  
 726 while  $\text{OPT}(Q)$  refers to an unconstrained solution. Note the difference between  $\text{OPT}_S$  and  $\text{OPT}|_S$   
 727 used in the previous section:  $\text{OPT}_S$  is a feasible solution that only contains items in  $S$  while  $\text{OPT}|_S$   
 728 is only a partial solution  $\text{OPT} \cap S$  corresponding to the unconstrained optimum  $\text{OPT}$ . Similarly,  
 729  $\text{ALG}(Q)$  refers to the algorithm’s solution for  $Q$ . Sometimes, we also refer to the cost incurred by  
 730 the algorithm when handling a subset of requests  $Q' \subseteq Q$ ; we refer to this cost as  $\text{ALG}(Q'|Q)$ .

## 731 C.2 Reduction

732 Recall that we seek discrete-smooth algorithms, i.e., satisfying Equation (1). Our first step is to give  
 733 a generic reduction that allows us to slightly weaken the guarantee to the following:

$$\text{ALG} \leq O(f(s)) \cdot \text{OPT}|_S + O(f(n)) \cdot \text{OPT}|_{\bar{S}}, \quad (9)$$

734 where  $O(f(\cdot))$  is the competitive ratio without predictions; note the substitution of  $s_\Delta$  with  $s$ . We  
 735 give a reduction from an algorithm that satisfies Equation (9) to one that satisfies Equation (1):

736 **Theorem C.1.** *Given an algorithm  $\text{ALG}'$  such that  $\text{ALG}' \leq O(f(s)) \cdot \text{OPT}|_S + O(g) \cdot \text{OPT}|_{\bar{S}}$ , there*  
 737 *exists an algorithm  $\text{ALG}$  such that  $\text{ALG} \leq O(f(s_\Delta)) \cdot \text{OPT}|_S + O(g) \cdot \text{OPT}|_{\bar{S}}$ .*

738 The basic idea in this theorem is the following: for every integer  $i$ , once the cost of the algorithm  
 739 exceeds  $2^i$ , we buy the cheapest predicted items of total cost at most  $2^i$ , and then remove them from  
 740 the prediction. While  $2^i < \text{OPT}$ , the total cost is  $O(1) \cdot \text{OPT}$ ; once  $2^i$  exceeds  $\text{OPT}$ , the size of the  
 741 prediction is at most  $s_\Delta$ , and Equation (9) implies Equation (1). This detailed proof of the theorem is  
 742 given in Appendix D.

## 743 C.3 Monotonicity and Online Amortization

744 **Monotonicity.** An additional, natural property that we demand from a constituent algorithm in our  
 745 smooth combination framework is that increasing the penalty of input requests does not decrease the  
 746 cost incurred by the algorithm. This is stated formally in the following definition.

747 **Definition C.2.** We say that a prize-collecting algorithm  $\text{ALG}$  is *monotone* if, fixing the input request  
 748 prefix  $((q_i, \pi_i))_{i=1}^{k-1}$  and current request  $(q_k, \pi_k)$ , then increasing  $\pi_k$  does not decrease  $\text{ALG}(q_k, \pi_k)$ .

749 **Online amortization.** Our framework extends to the case where Lagrangian subset-competitiveness  
 750 and monotonicity are satisfied by *amortized* costs instead of actual costs. This is important because  
 751 for some problems, the actual cost expressly prohibits subset competitiveness. For example, consider  
 752 facility location: given an input of multiple, identical requests with very small penalty, the algorithm  
 753 should eventually stop paying penalties and open a facility. However, for the specific request upon  
 754 which the facility is opened, the cost of the algorithm is much larger than the penalty for that request,  
 755 the latter being optimal for just that request. To overcome this complication, we allow the cost for a  
 756 request to be amortized over previous requests, and call this *online amortization*.

757 First, we define online amortization of costs, and define a “monotone” online amortization which can  
 758 be used in our framework.

759 **Definition C.3** (online amortization). Let  $Q = ((q_1, \pi_1), \dots, (q_n, \pi_n))$  be an online input given to  
 760  $\text{ALG}$ . An *online amortization* or *OA* is a number sequence  $(\text{OA}(q, \pi))_{(q, \pi) \in Q}$  such that:

1.  $\text{ALG}(Q) \leq \sum_{(q, \pi) \in Q} \text{OA}(q, \pi)$ .
2.  $\text{OA}(q_i, \pi_i)$  is only a function of  $(q_1, \pi_1), \dots, (q_i, \pi_i)$ ; that is,  $\text{OA}(q_i, \pi_i)$  can be calculated online.

When considering the amortized cost of an algorithm, we use similar notation to the actual cost: on an input  $Q$ , we use  $\text{OA}(Q)$  to denote the total amortized cost. We also use  $\text{OA}(Q'|Q)$  to denote the total amortized cost incurred on a request subset  $Q' \subseteq Q$ . In addition, for a request  $(q, \pi)$  in the input  $Q$ , we use  $\text{OA}(q, \pi)$  to refer to the amortized cost of  $(q, \pi)$ ; note that here the input  $Q$  should be clear from context.

**Definition C.4** (monotone online amortization). We call an online amortization  $\text{OA}$  *monotone* if **(a)** fixing previous requests, increasing the penalty of request  $(q, \pi)$  never decreases  $\text{OA}(q, \pi)$ , and **(b)** when the algorithm pays penalty for  $(q, \pi)$  then  $\text{OA}(q, \pi) \geq \pi$ .

#### C.4 The Main Theorem

We are now ready to state the main theorem of our algorithmic framework. We use  $\beta_1$  and  $\beta_2$  to denote the competitive ratios of  $\text{ALG}_1$  and  $\text{ALG}_2$ ; the reader should think of  $\beta_1$  as  $O(f(s))$  and  $\beta_2$  as  $O(f(n))$ , i.e.,  $\beta_2 \gg \beta_1$ .

**Theorem C.5.** Consider any online covering problem with predictions  $\mathcal{P}$ . Let  $\text{ALG}_1, \text{ALG}_2$  be two algorithms for the prize-collecting version of  $\mathcal{P}$  with monotone (online amortized) costs  $\text{OA}_1, \text{OA}_2$  respectively such that **(a)**  $\text{ALG}_1$  is Lagrangian  $\beta_1$ -subset-competitive using  $\text{OA}_1$  w.r.t. the prediction  $S$ , and **(b)**  $\text{ALG}_2$  is Lagrangian  $\beta_2$ -subset-competitive using  $\text{OA}_2$  (against general  $\text{OPT}$ ).

Then there exists an algorithm  $\text{ALG}$  for  $\mathcal{P}$  such that for every partition of the input  $Q$  into  $Q_1, Q_2$  we have

$$\text{ALG}(Q) \leq O(\beta_1) \cdot \text{OPT}_S(Q_1) + O(\beta_2) \cdot \text{OPT}(Q_2)$$

We will show later that Theorem C.5 can be used to derive Equation (9) for facility location and set cover.

*Proof of Theorem C.5.* Consider the framework in Algorithm 1 applied to algorithms  $\text{ALG}_1, \text{ALG}_2$ . The framework ensures that all requests are satisfied, as at least one of the constituent algorithms serves each request. Denote by  $\alpha(q)$  the final value assigned to the variable  $\alpha$  upon request  $q$ ; the prize-collecting input given to both constituent algorithms is  $Q^* = ((q, \alpha(q)))_{q \in Q}$ . We define  $Q_1^*, Q_2^*$  be the partition of  $Q^*$  induced by the partition of  $Q$  into  $Q_1, Q_2$ . As the algorithm only buys items bought by one of the constituent algorithms, its cost can thus be bounded by  $\text{ALG}_1(Q^*) + \text{ALG}_2(Q^*)$ . We now bound  $\text{ALG}_1(Q^*)$ ; bounding  $\text{ALG}_2(Q^*)$  is identical.

First, consider the prize-collecting solution which serves  $Q_1^*$  optimally subject to using items from  $S$ , but pays the penalty for requests from  $Q_2^*$ ; using the Lagrangian subset-competitiveness of  $\text{ALG}_1$  against this solution yields

$$\mathbb{E}[\text{ALG}_1(Q^*)] \leq O(\beta_1) \cdot \text{OPT}_S(Q_1) + \mathbb{E} \left[ O(1) \cdot \sum_{q \in Q_2} \alpha(q) \right] \quad (10)$$

Now, observe that using the definition of  $\alpha$  and the fact that  $\text{ALG}_2$  is monotone, we have that  $\alpha(q) \leq \text{ALG}_2(q, \alpha(q))$ ; summing over requests in  $Q_2$  we get that  $\sum_{q \in Q_2} \alpha(q) \leq \text{ALG}_2(Q_2^*|Q^*)$ . Plugging into Equation (10), we get

$$\begin{aligned} \mathbb{E}[\text{ALG}_1(Q^*)] &\leq O(\beta_1) \cdot \text{OPT}_S(Q_1) + \mathbb{E}[O(1) \cdot \text{ALG}_2(Q_2^*|Q^*)] \\ &\leq O(\beta_1) \cdot \text{OPT}_S(Q_1) + O(\beta_2) \cdot \text{OPT}(Q_2) \end{aligned}$$

where the second inequality uses the fact that  $\text{ALG}_2$  is subset competitive to bound its cost on the subset  $Q_2^*$  against the solution which serves those requests optimally. This completes the bounding of costs for  $\text{ALG}_1$ ; we can bound  $\mathbb{E}[\text{ALG}_2(Q^*)]$  in the same way. Summing the bounds for  $\text{ALG}_1$  and  $\text{ALG}_2$ , we get

$$\text{ALG}(Q) \leq O(\beta_1) \cdot \text{OPT}_S(Q_1) + O(\beta_2) \cdot \text{OPT}(Q_2)$$

which completes the proof.  $\square$

## C.5 Penalty-Robust Subset-Competitive Algorithms

In proving that a prize-collecting algorithm is Lagrangian subset-competitive (for use in our framework), we sometimes find it easier to prove that it is *penalty-robust subset competitive*. As we now prove, this latter property is sufficient to prove the former. (In fact, it is easy to see that both properties are in fact equivalent.)

**Definition C.6** (PRSC algorithm using online amortization). Let ALG be a randomized prize-collecting algorithm equipped with an online amortization OA running on an input  $Q$ . We say that ALG is  $\beta$  penalty-robust subset competitive (PRSC) using OA if both following conditions hold:

1. For every  $(q, \pi) \in Q$  we have  $\text{OA}(q, \pi) \leq O(1) \cdot \pi$ .
2. For every subset  $Q' \subseteq Q$ , we have  $\mathbb{E}[\text{OA}(Q'|Q)] \leq \beta \cdot \text{OPT}(\overline{Q'})$ .  
(where  $\overline{Q'}$  is the input formed from  $Q'$  by forcing service, i.e., setting penalties to infinity.)

If in the second condition of PRSC we replace  $\text{OPT}(\overline{Q'})$  by  $\text{OPT}_S(\overline{Q'})$ , we say that ALG is  $\beta$ -PRSC using OA w.r.t.  $S$ .

**Proposition C.7.** A  $\beta$ -PRSC algorithm using OA (w.r.t.  $S$ ) is also Lagrangian  $\beta$ -subset-competitive using OA (w.r.t.  $S$ ).

*Proof.* We prove this for a general solution, restricting to  $S$  is identical. Consider prize-collecting input  $Q$ , and any subset  $Q' \subseteq Q$ . Let SOL be the optimal solution for  $Q'$ , which pays penalties for  $Q'_p$  and serves  $Q'_b = Q' \setminus Q'_p$  optimally. Then it holds that

$$\begin{aligned} \mathbb{E}[\text{OA}(Q'|Q)] &= \mathbb{E}[\text{OA}(Q'_b|Q)] + \mathbb{E}[\text{OA}(Q'_p|Q)] \\ &\leq \beta \cdot \text{OPT}(\overline{Q'_b}) + O(1) \cdot \sum_{(q, \pi) \in Q'_p} \pi \\ &= \beta \cdot \text{SOL}^b(Q') + O(1) \cdot \text{SOL}^p(Q') \end{aligned}$$

where the inequality uses both properties of PRSC.  $\square$

## C.6 Proofs of Theorems 1.1, 1.2 and 1.3

We establish these theorems in three steps. First, we combine various constituent prize-collecting algorithms using Theorem C.5 and explicitly state the guarantees for the resulting algorithms. Then, we use these guarantees to derive the discrete-smoothness property for the individual problems with respect to the size of the prediction (i.e., Equation (9)). Finally, we use Theorem C.1 to make the competitive ratio depend on  $|S \setminus \text{OPT}|$  rather than on  $|S|$ .

Before proceeding further, we need to precisely define the intersection/difference of a solution with a prediction to make Theorem 1.1, Theorem 1.2, and Theorem 1.3 completely formal.

**Definition C.8** (restriction of solution with prediction). Consider an online covering problem with items  $\mathcal{E}$ , let  $S \subseteq \mathcal{E}$  be some prediction. For every solution  $A$  which buys some items from  $\mathcal{E}$ :

- Define  $A|_S$  to be the solution which only buys items from  $S$ , to the same amount as  $A$ .
- Define  $A|_{\overline{S}}$  to be the solution which only buys items outside  $S$ , to the same amount as  $A$ .

**Facility Location with Predictions.** In order to describe facility location as a covering problem, we must describe the set of items. Here, the set of items comprises an opening item  $b_v$  for each facility and a connection item  $c_{v,q}$  for each (request, facility) pair. When we informally write that  $S$  is a set of possible facilities, this can be formalized to the set of items  $b_v$  for  $v \in S$ , plus the connection items  $c_{v,q}$  for all  $q$  in the input and  $v \in S$ .

Due to Theorem 2.1 and Theorem B.1, we have that both Algorithm 2 and Algorithm 4 can serve as constituent algorithms in our framework. Combining both algorithms using Theorem C.5 thus implies the following theorem.

841 **Theorem C.9.** *For facility location with predictions, there exists a randomized algorithm ALG such*  
 842 *that for every input  $Q$ , and for every partition of  $Q$  into  $Q_1, Q_2$ , we have*

$$\mathbb{E}[\text{ALG}(Q)] \leq O(\log|S \setminus \text{OPT}|) \cdot \text{OPT}_S(Q_1) + O(\log|Q_2|) \cdot \text{OPT}(Q_2).$$

843 We obtain an additional result, which is useful for small metric spaces, from combining two instances  
 844 of Algorithm 2, one for the entire metric space  $X$  and one for the predictions  $S$ .

845 **Theorem C.10.** *For facility location with predictions, there exists a randomized algorithm ALG*  
 846 *such that for every input  $Q$ , and for every partition of  $Q$  into  $Q_1, Q_2$ , we have*

$$\mathbb{E}[\text{ALG}(Q)] \leq O(\log|S \setminus \text{OPT}|) \cdot \text{OPT}_S(Q_1) + O(\log|X|) \cdot \text{OPT}(Q_2).$$

847 *Proof of Theorem 1.1.* Consider a solution  $\text{OPT}$  to facility location on a set of requests  $Q$ . Partition  
 848  $Q$  into  $Q_1, Q_2$  such that  $Q_1$  contains all requests from  $Q$  that are connected to a facility in  $\text{OPT}|_S$   
 849 (and  $Q_2$  is complementary). Using the algorithm ALG from Theorem C.9, we have

$$\text{ALG}(Q) \leq O(\log|S|) \cdot \text{OPT}_S(Q_1) + O(\log|Q_2|) \cdot \text{OPT}(Q_2). \quad (11)$$

850 Now note that  $\text{OPT}|_S$  is a solution to  $Q_1$  that only uses facility and connection items from  $S$ , and thus  
 851  $\text{OPT}_S(Q_1) \leq \text{OPT}|_S$ . Moreover,  $\text{OPT}|_{\bar{S}}$  is a solution to  $Q_2$ , and thus  $\text{OPT}_S(Q_2) \leq \text{OPT}|_{\bar{S}}$ . Plugging  
 852 into Equation (12), and noting that  $|Q_2| \leq |Q|$ , we get

$$\text{ALG}(Q) \leq O(\log|S|) \cdot \text{OPT}|_S + O(\log|Q|) \cdot \text{OPT}|_{\bar{S}}.$$

853 We now plug the above equation into Theorem C.1, thus replacing the dependence on  $|S|$  with  
 854 dependence on  $|S \setminus \text{OPT}|$ .  $\square$

855 *Proof of Theorem 1.2.* Identical to the proof of Theorem 1.1, but using Theorem C.10.  $\square$

856 **Set Cover with Predictions.** Theorem 3.1 implies that Algorithm 3 is Lagrangian subset-competitive.  
 857 In addition, it is easy to see that Algorithm 3 is monotone, as defined in Definition C.2. Thus, the  
 858 algorithm can serve as a constituent algorithm in our framework. From combining two instances of  
 859 Algorithm 3, Theorem C.5 thus implies the following theorem.

860 **Theorem C.11.** *For fractional set cover with predictions, with universe  $(E, U)$  and a prediction*  
 861  *$S \subseteq U$ , there exists a deterministic algorithm ALG such that for every input  $Q$ , and for every partition*  
 862 *of  $Q$  into  $Q_1, Q_2$ , we have*

$$\text{ALG}(Q) \leq O(\log|S|) \cdot \text{OPT}_S(Q_1) + O(\log|U|) \cdot \text{OPT}(Q_2).$$

863 Using standard rounding techniques (see [3, 15]) for online set cover, we can round the fractional  
 864 solution online at a loss of  $O(\log|Q|)$ . In addition, we can then apply Theorem C.1 to replace  $|S|$   
 865 with  $|S \setminus \text{OPT}|$ . Thus, Theorem C.11 yields the following corollary.

866 **Corollary C.12.** *For (integral) set cover with predictions, with universe  $(E, U)$  and a prediction*  
 867  *$S \subseteq U$ , there exists a randomized algorithm ALG such that for every input  $Q$ , and for every partition*  
 868 *of  $Q$  into  $Q_1, Q_2$ , we have*

$$\mathbb{E}[\text{ALG}(Q)] \leq O(\log|Q| \log|S \setminus \text{OPT}|) \cdot \text{OPT}_S(Q_1) + O(\log|Q| \log|U|) \cdot \text{OPT}(Q_2).$$

869 *Proof of Theorem 1.3.* Consider a solution  $\text{OPT}$  to set cover on a set of requests  $Q$ . Partition  $Q$   
 870 into  $Q_1, Q_2$  such that  $Q_1$  contains all requests from  $Q$  that belong to a set in  $\text{OPT}|_S$  (and  $Q_2$  is  
 871 complementary). Using the randomized algorithm ALG from Corollary C.12, we have

$$\text{ALG}(Q) \leq O(\log|Q| \log|S|) \cdot \text{OPT}_S(Q_1) + O(\log|Q| \log|U|) \cdot \text{OPT}(Q_2). \quad (12)$$

872 Now note that  $\text{OPT}|_S$  is a solution to  $Q_1$  that only uses sets from  $S$ , and thus  $\text{OPT}_S(Q_1) \leq \text{OPT}|_S$ .  
 873 Moreover,  $\text{OPT}|_{\bar{S}}$  is a solution to  $Q_2$ , and thus  $\text{OPT}_S(Q_2) \leq \text{OPT}|_{\bar{S}}$ . Plugging into Equation (12),  
 874 we get

$$\text{ALG}(Q) \leq O(\log|Q| \log|S|) \cdot \text{OPT}|_S + O(\log|Q| \log|U|) \cdot \text{OPT}|_{\bar{S}}.$$

875  $\square$

## D Proof of Theorem C.1: Reduction from Equation 9 to Equation 1

In this section, we give the proof of Theorem C.1 whose goal is to give a reduction from Equation (9) to Equation (1). This replaces  $s$  in the bound of Equation (9) with the term  $s_\delta$ , where  $s_\delta := |S \setminus \text{OPT}|$ , in order to obtain Equation (1).

*Proof of Theorem C.1.* Assume, without loss of generality, that the cheapest item in  $\mathcal{E}$  costs 1. Consider the following construction of the algorithm ALG using the algorithm ALG':

```

1 Initialize  $i \leftarrow 0$ ,  $S' \leftarrow S$ ,  $B \leftarrow 0$ , and define the item cost function  $c' \leftarrow c$ .
2 Let  $A$  be an instance of ALG' with prediction set  $S'$ , and cost function  $c'$ .
3 for incoming request  $q$  do
4   while True do
5     Simulate sending  $q$  to  $A$ , and let  $c$  be the resulting cost.
6     if  $B + c < 2^i$  then break
7     Spend  $2^i$  budget in buying the cheapest items in  $S'$ , let the bought subset of items be  $T$ .
8     Set  $S' \leftarrow S' \setminus T$ ,  $B \leftarrow 0$ ,  $i \leftarrow i + 1$ .
9     For every  $e \in T$ , set  $c'(e) \leftarrow 0$ .
10    Reset  $A$  to be a new instance of ALG', given  $S'$  as prediction, and using the (modified) cost function
         $c'$ .
11    Send  $q$  to  $A$ , and set  $B \leftarrow B + c$ .
```

For integer  $\ell$ , define *phase*  $\ell$  to be the subsequence of requests in which variable  $i$  takes value  $\ell$ . The cost of the algorithm can be charged to a constant times  $2^j$ , where  $j$  is the penultimate value of  $i$  in the algorithm. If  $2^{j-1} < \text{OPT}$ , then the cost of the algorithm is at most  $O(1) \cdot \text{OPT}$  and we are done. Henceforth, suppose  $\text{OPT} \leq 2^{j-1}$ . Define  $S'_j, A_j, c'_j$  to be the values of the variables  $S', A$  and  $c'$  during phase  $j$ . When considering the cost of a solution relative to a cost function, we place that cost function as superscript (e.g.,  $\text{OPT}^{c'_j}$ ). Before the beginning of phase  $j$ , the algorithm spent at least  $\text{OPT}$  budget on buying the cheapest items in the (remaining) prediction; it thus holds that  $|S'_j| \leq |S \setminus \text{OPT}|$ . Let  $q_1, \dots, q_k$  be the requests of phase  $j$ ; moreover, let  $q_{k+1}$  be the request upon which the variable  $i$  was incremented to  $j + 1$ . From the definition of  $q_{k+1}$ , it holds that the cost of the instance of  $A$  in phase  $j$  on  $(q_1, \dots, q_k, q_{k+1})$  is at least  $2^j$ ; thus, the total cost of the algorithm can be charged to this cost, which we denote by  $\alpha$ . But, through Equation (9), and from the fact that  $\text{OPT}$  is a solution which serves  $(q_1, \dots, q_{k+1})$ , we have

$$\begin{aligned}
\alpha &\leq O(f(|S \setminus \text{OPT}|)) \cdot \text{OPT}^{c'_j}|_{S'_j} + O(g) \cdot \text{OPT}^{c'_j}|_{\overline{S'_j}} \\
&\leq O(f(|S \setminus \text{OPT}|)) \cdot \text{OPT}|_{S'_j} + O(g) \cdot \left( \text{OPT}^{c'_j}|_{\overline{S}} + \text{OPT}^{c'_j}|_{S \setminus S'_j} \right) \\
&\leq O(f(|S \setminus \text{OPT}|)) \cdot \text{OPT}|_S + O(g) \cdot \text{OPT}|_{\overline{S}}
\end{aligned}$$

□

## E Proof of Lemma 3.4

*Proof of Lemma 3.4.* First, note that  $\text{ALG}(q, \pi) \leq 3y_q$ , where  $y_q$  is the final value of the variable of that name: Proposition 3.5 implies that the buying cost is at most  $2y_q$ , while a penalty of  $\pi$  is paid only if  $\pi \leq y_q$ . We show that  $\sum_{(q, \pi) \in Q'} y_q \leq O(\log m) \cdot \text{OPT}(\overline{Q'})$ ; since  $\text{ALG}(q, \pi) \leq 3 \cdot y_q$ , this would complete the proof of the lemma. Consider the (standard) primal and dual LPs for fractional set cover of  $Q'$  without penalties (i.e. solving  $\overline{Q'}$ ). The primal LP is given by:

$$\min \sum_{s \in U} x_s \cdot c(s) \text{ such that } \forall q \in Q' : \sum_{s|q \in s} x_s \geq 1 \text{ and } \forall s \in U : x_s \geq 0.$$

and the dual LP is given by:

$$\max \sum_{q \in Q'} y_q \text{ such that } \forall s \in U : \sum_{q|q \in s} y_q \leq c(s) \text{ and } \forall q \in Q' : y_q \geq 0.$$

We claim that the dual solution  $\{y_q\}_{q \in Q'}$  violates dual constraints by at most  $O(\log m)$ ; thus, scaling it down by that factor yields a feasible dual solution, and a lower bound to  $\text{OPT}(\overline{Q'})$ .



904 Consider the dual constraint corresponding to the set  $s$ ; we want to bound the term  $\sum_{q \in Q' | q \in s} y_q$ .  
 905 Through induction on  $k$ , we can prove that once  $\sum_{q \in Q' | q \in s} y_q = k$  for some integer  $k$ , it holds that

906  $x_s \geq \frac{1}{m} \left( \left( 1 + \frac{1}{c_s} \right)^k - 1 \right)$ . Thus, once  $k = \Theta(c_s \log m)$  we have  $x_s \geq 1$ , and  $\sum_{q \in s} y_q$  would increase  
 907 no more. This implies that scaling down  $\{y_q\}_{q \in Q'}$  by  $\Theta(\log m)$  yields a feasible dual solution, which  
 908 lower bounds  $\text{OPT}(\overline{Q'})$ , and completes the proof.

909 It remains to prove the inductive claim. For the base case where  $k = 0$ , the claim holds trivially. Now,  
 910 assume that the claim holds for  $k - 1$ , and consider point in which  $\sum_{q \in Q' | q \in s} y_q$  is incremented from  
 911  $k - 1$  to  $k$ ; let  $x, x'$  be the old and new amounts by which  $s$  is held in the algorithm. We have

$$x' = x \cdot \left( 1 + \frac{1}{c(s)} \right) + \frac{1}{U(q)c(s)} \geq \frac{1}{m} \left( \left( 1 + \frac{1}{c(s)} \right)^k - 1 - \frac{1}{c(s)} \right) + \frac{1}{mc(s)} \geq \frac{1}{m} \left( \left( 1 + \frac{1}{c(s)} \right)^k - 1 \right) \quad (13)$$

912 where the inequality uses the inductive hypothesis as well as the fact that  $|U(q)| \leq m$ .  $\square$
